# Supplementary material for: KI-catalyzed reactions of aryl hydrazines with α-oxocarboxylic acids in the presence of CO2: access to 1,3,4-oxadiazol-2(3H)-ones
Source: Royal Society of Chemistry journal article supplement (doi:10.1039/c8qo01345d), 2019-01-01

## Supporting Information

### **KI- catalyzed reaction of aryl hydrazines with $\alpha$ -oxocarboxylic acids in the presence of CO<sub>2</sub>: access to 1,3,4-oxadiazol-2(3*H*)-ones**

Na Yang, Hao Zhang and Gaoqing Yuan\*

Key Laboratory of Functional Molecular Engineering of Guangdong Province, School of  
Chemistry and Chemical Engineering, South China University of Technology  
Guangzhou 510640, China  
E-mail: [gqyuan@scut.edu.cn](mailto:gqyuan@scut.edu.cn)

#### List of contents

|                                                                                   |     |
|-----------------------------------------------------------------------------------|-----|
| 1. General methods.....                                                           | S2  |
| 2. General procedure for the synthesis of 1,3,4-oxadiazol-2(3 <i>H</i> )-one..... | S2  |
| 3. General procedure for $\alpha$ -oxocarboxylic acids.....                       | S2  |
| 4. Characterization data .....                                                    | S3  |
| 5. Reference .....                                                                | S11 |
| 6. NMR spectra .....                                                              | S12 |

## 1. General methods

<sup>1</sup>H and <sup>13</sup>C NMR spectra were recorded by using a Bruker DRX-400 spectrometer and CDCl<sub>3</sub> as the solvent. The chemical shifts were referenced to signals at 7.26 and 77.23 ppm, respectively. Mass spectra were recorded on a Thermo Scientific ISQ gas chromatograph-mass spectrometer. The data of HRMS were obtained on a high resolution mass spectrometer (LCMS-IT-TOF). Melting points were determined with a Büchi Melting Point B-545 instrument.

## 2. General procedure for the synthesis of 1,3,4-oxadiazol-2(3H)-one

In a typical procedure, phenylhydrazine **1a** (0.5 mmol), 2-oxo-2-phenylacetic acid **2a** (0.5 mmol), KI (0.2 equiv.), TBHP (4.0 equiv. 70% in water) and K<sub>2</sub>CO<sub>3</sub> (2 equiv.) were dissolved in 5 mL MeOH in a dried 15 mL polytetrafluoroethylene (PTFE) reaction vessel. The vessel was fixed into a stainless-steel autoclave with a pressure regulating system. Then the autoclave was sealed and CO<sub>2</sub> was introduced from a cylinder. The reaction was carried out at the selected temperature under magnetic stirring for 4.5 h and the pressure was kept constant during the reaction. After the reaction was completed, the vessel was cooled and the pressure was released slowly to atmospheric pressure. Then reaction mixture was diluted with H<sub>2</sub>O (20 mL) and extracted with EtOAc (15 mL×3). The combined organic layer was dried over anhydrous MgSO<sub>4</sub> and then filtered. The solvent was removed under vacuo and the crude product was separated by column chromatography on a silica gel column using petroleum ether/ethyl acetate as eluent to give the desired product **3** or **4**.

## 3. General procedure for $\alpha$ -oxocarboxylic acids<sup>1</sup>

The substituted  $\alpha$ -oxocarboxylic acids (**2a–2j**) were prepared by oxidation of corresponding methyl ketones with SeO<sub>2</sub> (Scheme S1). Methyl ketones (5 mmol), SeO<sub>2</sub> (6 mmol), 20 mL of pyridine were added in a 50 mL round-bottom flask. The reaction mixture was stirred at 110 °C for 1 h, then reduce the temperature to 90 °C for 4 h. The desired products (**2a–2j**) were isolated by silica-gel column chromatography

in excellent yields (65–90%).

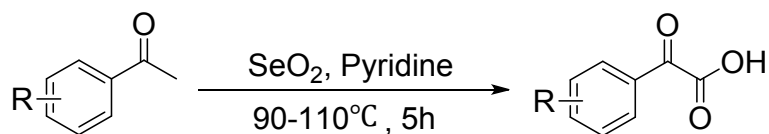

**Scheme S1** Preparation of  $\alpha$ -oxocarboxylic acids.

## 4. Characterization data

### 3,5-diphenyl-1,3,4-oxadiazol-2(3H)-one (3a)<sup>2</sup>

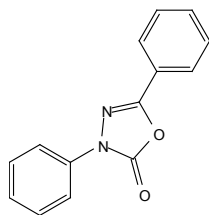

White solid, mp 109–110 °C; <sup>1</sup>H NMR (400 MHz, CDCl<sub>3</sub>):  $\delta$  (ppm) 7.83 (t,  $J$  = 7.4 Hz, 4H), 7.42 – 7.33 (m, 5H), 7.16 (t,  $J$  = 7.4 Hz, 1H); <sup>13</sup>C NMR (100 MHz, CDCl<sub>3</sub>):  $\delta$  (ppm) 153.7, 150.8, 136.2, 132.1, 129.3, 129.2, 126.3, 126.1, 123.6, 118.4.

### 3-(4-fluorophenyl)-5-phenyl-1,3,4-oxadiazol-2(3H)-one (3b)<sup>2</sup>

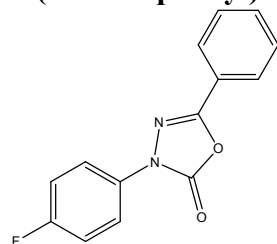

White solid, mp 148–150 °C; <sup>1</sup>H NMR (400 MHz, CDCl<sub>3</sub>):  $\delta$  (ppm) 7.92 (td,  $J$  = 6.8, 3.1 Hz, 4H), 7.55 – 7.49 (m, 3H), 7.18 – 7.13 (m, 2H); <sup>13</sup>C NMR (100 MHz, CDCl<sub>3</sub>):  $\delta$  (ppm) 160.8 (d,  $J$  = 244.7 Hz), 153.8, 150.9, 132.4 (d,  $J$  = 2.8 Hz), 132.3, 129.3, 126.2, 123.5, 120.4 (d,  $J$  = 8.2 Hz), 116.2 (d,  $J$  = 22.8 Hz).

### 3-(4-chlorophenyl)-5-phenyl-1,3,4-oxadiazol-2(3H)-one (3c)<sup>2</sup>

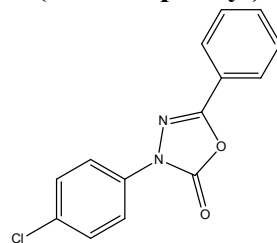

White solid, mp 143–145 °C; <sup>1</sup>H NMR (400 MHz, CDCl<sub>3</sub>):  $\delta$  (ppm) 7.91 (t,  $J$  = 8.3 Hz, 4H), 7.55 – 7.48 (m, 3H), 7.42 (d,  $J$  = 8.9 Hz, 2H); <sup>13</sup>C NMR (100 MHz, CDCl<sub>3</sub>):  $\delta$  (ppm) 153.9, 150.6, 134.8, 132.3, 131.7, 129.5, 129.3, 126.2, 123.4, 119.6.

### 3-(4-bromophenyl)-5-phenyl-1,3,4-oxadiazol-2(3H)-one (3d)<sup>3</sup>

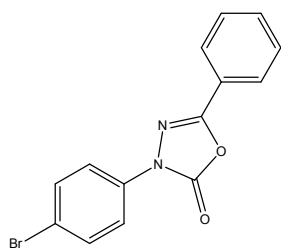

White solid, mp 135–137 °C;  $^1\text{H NMR}$  (400 MHz,  $\text{CDCl}_3$ ):  $\delta$  (ppm) 7.91 (d,  $J = 7.1$  Hz, 2H), 7.83 (d,  $J = 8.9$  Hz, 2H), 7.56 – 7.47 (m, 5H);  $^{13}\text{C NMR}$  (100 MHz,  $\text{CDCl}_3$ ):  $\delta$  (ppm) 153.9, 150.5, 135.3, 132.4, 132.3, 129.3, 126.2, 123.4, 119.8, 119.4.

### 5-phenyl-3-(4-(trifluoromethyl)phenyl)-1,3,4-oxadiazol-2(3H)-one (3e)

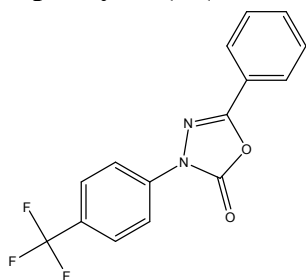

White solid, mp 111–113 °C;  $^1\text{H NMR}$  (400 MHz,  $\text{CDCl}_3$ ):  $\delta$  (ppm) 8.05 (d,  $J = 8.4$  Hz, 2H), 7.89 (d,  $J = 7.1$  Hz, 2H), 7.67 (d,  $J = 8.5$  Hz, 2H), 7.55 – 7.45 (m, 3H);  $^{13}\text{C NMR}$  (100 MHz,  $\text{CDCl}_3$ ):  $\delta$  (ppm) 154.1, 150.4, 138.9, 132.4, 129.3 (q,  $J = 87.8$  Hz), 129.2, 126.6 (q,  $J = 3.7$  Hz), 126.2, 124.0 (q,  $J = 273.6$  Hz), 123.1, 117.9; **HRMS** (ESI)  $m/z$ : calcd for  $\text{C}_{15}\text{H}_9\text{F}_3\text{N}_2\text{NaO}_2$   $[\text{M}+\text{Na}]^+$  329.0508, found 329.0509.

### 4-(2-oxo-5-phenyl-1,3,4-oxadiazol-3(2H)-yl)benzonitrile (3f)<sup>2</sup>

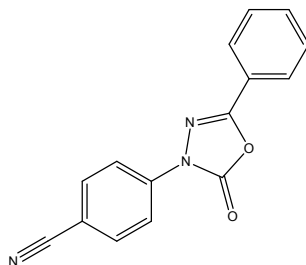

Brown solid, mp 165–167 °C;  $^1\text{H NMR}$  (400 MHz,  $\text{CDCl}_3$ ):  $\delta$  (ppm) 8.10 (d,  $J = 8.8$  Hz, 2H), 7.93 – 7.91 (m, 2H), 7.73 (d,  $J = 8.8$  Hz, 2H), 7.55 (dd,  $J = 18.0, 7.5$  Hz, 3H);  $^{13}\text{C NMR}$  (100 MHz,  $\text{CDCl}_3$ ):  $\delta$  (ppm) 174.8, 154.4, 150.2, 139.5, 133.5, 132.7, 129.3, 126.3, 122.9, 118.2, 109.3.

### 3-(4-nitrophenyl)-5-phenyl-1,3,4-oxadiazol-2(3H)-one (3g)<sup>2</sup>

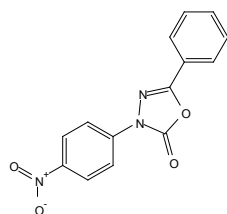

Brown solid, mp 167–169 °C;  $^1\text{H NMR}$  (400 MHz,  $\text{CDCl}_3$ ):  $\delta$  (ppm) 8.32 (d,  $J = 7.9$  Hz, 2H), 8.16 (d,  $J = 7.7$  Hz, 2H), 7.94 (d,  $J = 6.3$  Hz, 2H), 7.56 (dd,  $J = 18.0, 6.6$  Hz, 3H);  $^{13}\text{C NMR}$  (100 MHz,  $\text{CDCl}_3$ ):  $\delta$  (ppm) 154.6, 150.2, 145.1, 141.0, 132.8, 129.4, 126.4, 125.2, 122.8, 118.0.

### 5-phenyl-3-(p-tolyl)-1,3,4-oxadiazol-2(3H)-one (3h)<sup>3</sup>

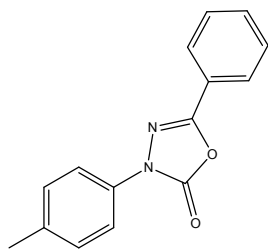

White solid, mp 154-156°C; <sup>1</sup>H NMR (400 MHz, CDCl<sub>3</sub>): δ (ppm) 7.91

(d, *J* = 8.2 Hz, 2H), 7.79 (d, *J* = 8.5 Hz, 2H), 7.51 – 7.46 (m, 3H), 7.24 (d, *J* = 8.6 Hz, 2H), 2.36 (s, 3H); <sup>13</sup>C NMR (100 MHz, CDCl<sub>3</sub>): δ (ppm) 153.5, 150.9, 136.1, 133.8, 132.0, 129.9, 129.2, 126.1, 123.7, 118.5, 21.1.

### 3-(4-isopropylphenyl)-5-phenyl-1,3,4-oxadiazol-2(3H)-one (3i)

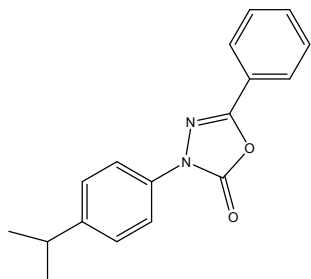

Brown oil; <sup>1</sup>H NMR (400 MHz, CDCl<sub>3</sub>): δ (ppm) 7.93 (dd, *J* = 8.1, 1.4 Hz, 2H), 7.85 – 7.81 (m, 2H), 7.53 – 7.47 (m, 3H), 7.32 (d, *J* = 8.6 Hz, 2H), 2.94 (dt, *J* = 13.8, 6.9 Hz, 1H), 1.28 (s, 3H), 1.26 (s, 3H); <sup>13</sup>C NMR (100 MHz, CDCl<sub>3</sub>): δ (ppm) 153.6, 151.0, 147.3, 134.0, 132.0, 129.2, 127.3, 126.1, 123.8, 118.8, 33.9, 24.1; HRMS (ESI) *m/z*: calcd for C<sub>17</sub>H<sub>16</sub>N<sub>2</sub>NaO<sub>2</sub> [M+Na]<sup>+</sup> 303.1104, found 303.1102.

### 3-(4-methoxyphenyl)-5-phenyl-1,3,4-oxadiazol-2(3H)-one (3j)<sup>3</sup>

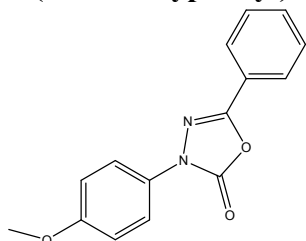

White solid, mp 138–140 °C; <sup>1</sup>H NMR (400 MHz, CDCl<sub>3</sub>): δ (ppm) 7.92 (dd, *J* = 8.0, 1.4 Hz, 2H), 7.83 – 7.80 (m, 2H), 7.53 – 7.47 (m, 3H), 6.98 – 6.96 (m, 2H), 3.82 (s, 3H); <sup>13</sup>C NMR (100 MHz, CDCl<sub>3</sub>): δ (ppm) 158.1, 153.5, 151.1, 132.0, 129.5, 129.2, 126.1, 123.8, 120.4, 114.5, 55.7.

### 3-(2-fluorophenyl)-5-phenyl-1,3,4-oxadiazol-2(3H)-one (3k)

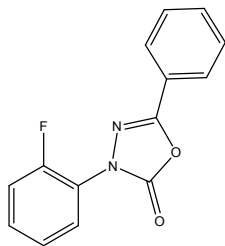

Brown solid, mp 101–103 °C;  $^1\text{H NMR}$  (400 MHz,  $\text{CDCl}_3$ ):  $\delta$  (ppm) 7.91 (d,  $J = 7.7$  Hz, 2H), 7.59 (t,  $J = 7.7$  Hz, 1H), 7.51 (dt,  $J = 14.7, 7.4$  Hz, 3H), 7.42 (dd,  $J = 12.9, 7.6$  Hz, 1H), 7.26 (dd,  $J = 12.3, 7.4$  Hz, 2H);  $^{13}\text{C NMR}$  (100 MHz,  $\text{CDCl}_3$ ):  $\delta$  (ppm) 156.6 (d,  $J = 253.5$  Hz), 154.7, 151.7, 132.2, 130.7 (d,  $J = 7.7$  Hz), 129.2, 127.1, 126.1, 124.9 (d,  $J = 3.9$  Hz), 123.6, 123.1 (d,  $J = 11.6$  Hz), 117.3 (d,  $J = 19.2$  Hz); **HRMS** (ESI)  $m/z$ : calcd for  $\text{C}_{14}\text{H}_{10}\text{FN}_2\text{O}_2$   $[\text{M}+\text{H}]^+$  257.0721, found 257.0717.

### 3-(2-chlorophenyl)-5-phenyl-1,3,4-oxadiazol-2(3H)-one (3l)

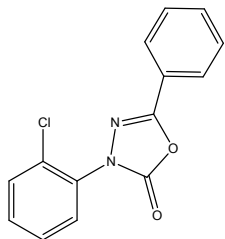

White solid, mp 121–123 °C;  $^1\text{H NMR}$  (400 MHz,  $\text{CDCl}_3$ ):  $\delta$  (ppm) 7.91 (d,  $J = 7.6$  Hz, 2H), 7.55 (s, 2H), 7.50 (dd,  $J = 13.9, 6.6$  Hz, 3H), 7.43 – 7.41 (m, 2H);  $^{13}\text{C NMR}$  (100 MHz,  $\text{CDCl}_3$ ):  $\delta$  (ppm) 154.5, 151.9, 132.6, 132.2, 132.1, 131.1, 131.0, 129.2, 129.1, 128.0, 126.1, 123.7. **HRMS** (ESI)  $m/z$ : calcd for  $\text{C}_{14}\text{H}_{10}\text{ClN}_2\text{O}_2$   $[\text{M}+\text{H}]^+$  273.0425, found 273.0419.

### 3-(2-bromophenyl)-5-phenyl-1,3,4-oxadiazol-2(3H)-one (3m)

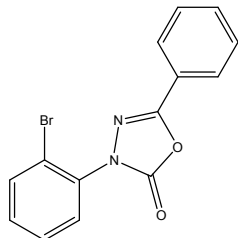

Brown solid, mp 123–125 °C;  $^1\text{H NMR}$  (400 MHz,  $\text{CDCl}_3$ ):  $\delta$  (ppm) 7.93 (d,  $J = 7.4$  Hz, 2H), 7.75 (d,  $J = 8.0$  Hz, 1H), 7.51 (ddd,  $J = 20.6, 13.4, 7.7$  Hz, 5H), 7.37 (t,  $J = 7.7$  Hz, 1H);  $^{13}\text{C NMR}$  (100 MHz,  $\text{CDCl}_3$ ):  $\delta$  (ppm) 154.4, 151.8, 134.2, 134.2, 132.2, 131.5, 129.5, 129.3, 128.7, 126.1, 123.7, 121.8; **HRMS** (ESI)  $m/z$ : calcd for  $\text{C}_{14}\text{H}_{10}\text{BrN}_2\text{O}_2$   $[\text{M}+\text{H}]^+$  316.9920, found 316.9912.

### 3-(3-bromophenyl)-5-phenyl-1,3,4-oxadiazol-2(3H)-one (3n)

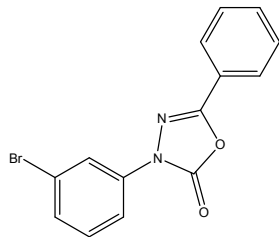

White solid, mp 125–127 °C;  $^1\text{H NMR}$  (400 MHz,  $\text{CDCl}_3$ ):  $\delta$  (ppm) 8.12 (t,  $J = 1.9$  Hz, 1H), 7.93 (dt,  $J = 8.4, 1.7$  Hz, 3H), 7.55 – 7.48 (m, 3H), 7.39 (dd,  $J = 8.0, 1.6$  Hz,

1H), 7.31 (t,  $J = 8.1$  Hz, 1H);  $^{13}\text{C}$  NMR (100 MHz,  $\text{CDCl}_3$ ):  $\delta$  (ppm) 154.0, 150.5, 137.3, 132.4, 130.7, 129.3, 129.2, 126.2, 123.3, 123.1, 121.3, 116.7; HRMS (ESI)  $m/z$ : calcd for  $\text{C}_{14}\text{H}_{10}\text{BrN}_2\text{O}_2$   $[\text{M}+\text{H}]^+$  316.9920, found 316.9916.

### 5-phenyl-3-(*m*-tolyl)-1,3,4-oxadiazol-2(3*H*)-one (3o)

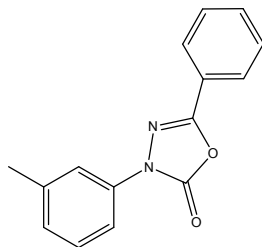

Brown solid, mp 99–101 °C;  $^1\text{H}$  NMR (400 MHz,  $\text{CDCl}_3$ ):  $\delta$  (ppm) 7.94

(dd,  $J = 8.1, 1.5$  Hz, 2H), 7.75 (d,  $J = 12.0$  Hz, 2H), 7.54 – 7.47 (m, 3H), 7.34 (t,  $J = 7.8$  Hz, 1H), 7.09 (d,  $J = 7.6$  Hz, 1H), 2.42 (s, 3H);  $^{13}\text{C}$  NMR (100 MHz,  $\text{CDCl}_3$ ):  $\delta$  (ppm) 153.7, 150.9, 139.5, 136.2, 132.1, 129.2, 127.2, 126.2, 123.7, 119.1, 115.7, 21.8. HRMS (ESI)  $m/z$ : calcd for  $\text{C}_{15}\text{H}_{13}\text{N}_2\text{O}_2$   $[\text{M}+\text{H}]^+$  253.0972, found 253.0968.

### 5-phenyl-3-(*o*-tolyl)-1,3,4-oxadiazol-2(3*H*)-one (3p)

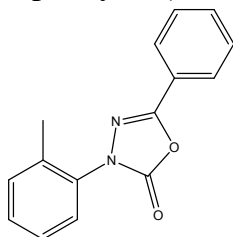

Brown solid, mp 107–109 °C;  $^1\text{H}$  NMR (400 MHz,  $\text{CDCl}_3$ ):  $\delta$  (ppm) 7.91 (d,

$J = 6.8$  Hz, 2H), 7.52 (dd,  $J = 10.9, 7.2$  Hz, 3H), 7.43 (d,  $J = 7.4$  Hz, 1H), 7.36 – 7.32 (m, 3H), 2.38 (s, 3H);  $^{13}\text{C}$  NMR (100 MHz,  $\text{CDCl}_3$ ):  $\delta$  (ppm) 154.2, 152.3, 135.3, 134.0, 132.0, 131.7, 129.7, 129.2, 127.1, 126.7, 126.0, 123.9, 18.3. HRMS (ESI)  $m/z$ : calcd for  $\text{C}_{15}\text{H}_{13}\text{N}_2\text{O}_2$   $[\text{M}+\text{H}]^+$  253.0972, found 253.0966.

### 3-(3-chloro-4-fluorophenyl)-5-phenyl-1,3,4-oxadiazol-2(3*H*)-one (3q)

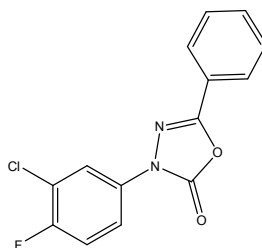

Brown solid, mp 126–128 °C;  $^1\text{H}$  NMR (400 MHz,  $\text{CDCl}_3$ ):  $\delta$  (ppm) 8.04

(d,  $J = 4.1$  Hz, 1H), 7.90 (dd,  $J = 24.2, 8.1$  Hz, 3H), 7.53 (dt,  $J = 14.2, 6.9$  Hz, 3H), 7.22 (d,  $J = 8.5$  Hz, 1H);  $^{13}\text{C}$  NMR (100 MHz,  $\text{CDCl}_3$ ):  $\delta$  (ppm) 156.2 (d,  $J = 247.4$  Hz), 154.1, 150.5, 132.8 (d,  $J = 3.2$  Hz), 132.5, 129.3, 126.3, 123.3, 122.0 (d,  $J = 18.9$  Hz), 120.7, 118.0 (d,  $J = 7.1$  Hz), 117.2 (d,  $J = 22.2$  Hz); HRMS (ESI)  $m/z$ : calcd for  $\text{C}_{14}\text{H}_8\text{ClFN}_2\text{NaO}_2$   $[\text{M}+\text{Na}]^+$  313.0151, found 313.0150.

### 3-(3-chloro-4-methylphenyl)-5-phenyl-1,3,4-oxadiazol-2(3*H*)-one (3r)

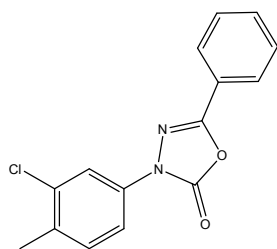

White solid, mp 152–154 °C;  $^1\text{H NMR}$  (400 MHz,  $\text{CDCl}_3$ ):  $\delta$  (ppm) 7.60 (dd,  $J = 177.9, 75.8$  Hz, 8H), 2.35 (s, 3H);  $^{13}\text{C NMR}$  (100 MHz,  $\text{CDCl}_3$ ):  $\delta$  (ppm) 153.8, 150.5, 135.1, 134.9, 134.0, 132.2, 131.4, 129.2, 126.1, 123.4, 118.8, 116.3, 19.7; **HRMS** (ESI)  $m/z$ : calcd for  $\text{C}_{15}\text{H}_{11}\text{ClN}_2\text{NaO}_2$  [ $\text{M}+\text{Na}$ ] $^+$  309.0401, found 309.0403.

### 3-(3,5-dimethylphenyl)-5-phenyl-1,3,4-oxadiazol-2(3H)-one (3s)

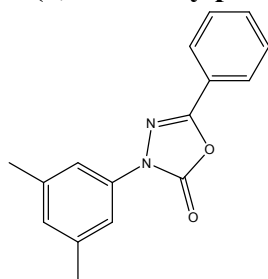

Brown oil;  $^1\text{H NMR}$  (400 MHz,  $\text{CDCl}_3$ ):  $\delta$  (ppm) 7.94 (d,  $J = 6.9$  Hz, 2H), 7.56 – 7.48 (m, 5H), 6.91 (s, 1H), 2.38 (s, 6H);  $^{13}\text{C NMR}$  (100 MHz,  $\text{CDCl}_3$ ):  $\delta$  (ppm) 153.6, 151.0, 139.3, 136.1, 132.1, 129.2, 128.1, 126.1, 123.7, 116.3, 21.7; **HRMS** (ESI)  $m/z$ : calcd for  $\text{C}_{16}\text{H}_{14}\text{N}_2\text{NaO}_2$  [ $\text{M}+\text{Na}$ ] $^+$  289.0947, found 289.0949.

### 5-(4-fluorophenyl)-3-phenyl-1,3,4-oxadiazol-2(3H)-one (4a)<sup>2</sup>

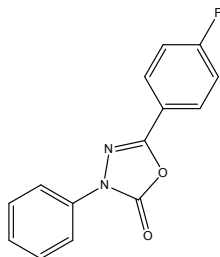

White solid, mp 141–143 °C;  $^1\text{H NMR}$  (400 MHz,  $\text{CDCl}_3$ ):  $\delta$  (ppm) 7.95 – 7.91 (m, 4H), 7.46 (t,  $J = 8.0$  Hz, 2H), 7.29 – 7.25 (m, 1H), 7.19 (t,  $J = 8.6$  Hz, 2H);  $^{13}\text{C NMR}$  (100 MHz,  $\text{CDCl}_3$ ):  $\delta$  (ppm) 165.1 (d,  $J = 252.2$  Hz), 153.0, 150.7, 136.2, 129.4, 128.5 (d,  $J = 8.9$  Hz), 126.4, 120.0 (d,  $J = 3.2$  Hz), 118.5, 116.7 (d,  $J = 8.6$  Hz).

### 5-(4-chlorophenyl)-3-phenyl-1,3,4-oxadiazol-2(3H)-one (4b)<sup>2</sup>

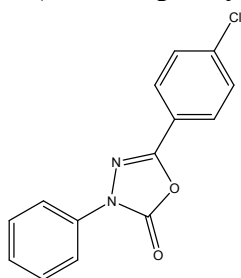

White solid, mp 136–138 °C;  $^1\text{H NMR}$  (400 MHz,  $\text{CDCl}_3$ ):  $\delta$  (ppm) 7.92 (d,  $J = 8.0$  Hz, 2H), 7.86 (d,  $J = 8.4$  Hz, 2H), 7.46 (t,  $J = 9.4$  Hz, 4H), 7.28 (t,  $J = 7.7$  Hz, 1H);  $^{13}\text{C}$



**NMR** (100 MHz, CDCl<sub>3</sub>):  $\delta$  (ppm) 152.9, 150.6, 138.5, 136.1, 129.7, 129.4, 127.4, 126.5, 122.1, 118.5.

**5-(4-bromophenyl)-3-phenyl-1,3,4-oxadiazol-2(3H)-one (4c)<sup>2</sup>**

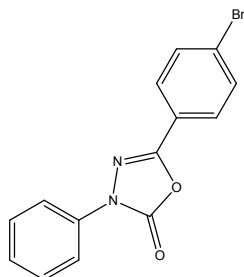

White solid, mp 124–126 °C; **<sup>1</sup>H NMR** (400 MHz, CDCl<sub>3</sub>):  $\delta$  (ppm) 7.92 (d,  $J$  = 8.2 Hz, 2H), 7.81 (d,  $J$  = 8.4 Hz, 2H), 7.65 (d,  $J$  = 8.4 Hz, 2H), 7.47 (t,  $J$  = 7.7 Hz, 2H), 7.28 (dd,  $J$  = 13.5, 6.1 Hz, 1H); **<sup>13</sup>C NMR** (100 MHz, CDCl<sub>3</sub>):  $\delta$  (ppm) 153.1, 150.7, 136.2, 132.7, 129.5, 127.6, 126.9, 126.5, 122.6, 118.6.

**3-phenyl-5-(p-tolyl)-1,3,4-oxadiazol-2(3H)-one (4d)<sup>2</sup>**

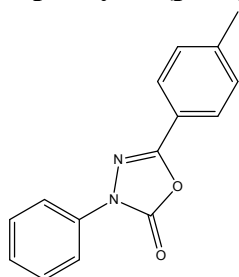

White solid, mp 149–151 °C; **<sup>1</sup>H NMR** (400 MHz, CDCl<sub>3</sub>):  $\delta$  (ppm) 7.93 (d,  $J$  = 8.1 Hz, 2H), 7.81 (d,  $J$  = 8.1 Hz, 2H), 7.47 (s, 2H), 7.30 – 7.24 (m, 3H), 2.41 (s, 3H); **<sup>13</sup>C NMR** (100 MHz, CDCl<sub>3</sub>):  $\delta$  (ppm) 153.9, 150.9, 142.8, 136.3, 129.9, 129.4, 126.2, 126.1, 120.9, 118.4, 21.9.

**5-(4-methoxyphenyl)-3-phenyl-1,3,4-oxadiazol-2(3H)-one (4e)<sup>2</sup>**

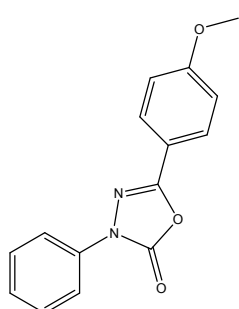

White solid, mp 143–145 °C; **<sup>1</sup>H NMR** (400 MHz, CDCl<sub>3</sub>):  $\delta$  (ppm) 7.92 (d,  $J$  = 7.8 Hz, 2H), 7.85 (d,  $J$  = 8.9 Hz, 2H), 7.45 (t,  $J$  = 8.0 Hz, 2H), 7.25 (t,  $J$  = 7.4 Hz, 1H), 6.97 (d,  $J$  = 8.9 Hz, 2H), 3.84 (s, 3H); **<sup>13</sup>C NMR** (100 MHz, CDCl<sub>3</sub>):  $\delta$  (ppm) 162.7, 153.7, 150.9, 136.3, 129.3, 127.9, 126.1, 118.3, 116.0, 114.7, 55.6.

**5-(3-chlorophenyl)-3-phenyl-1,3,4-oxadiazol-2(3H)-one (4f)**

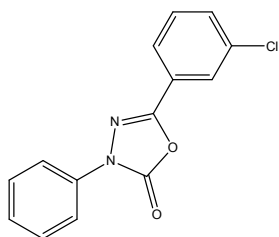

White solid, mp 107–109 °C;  $^1\text{H NMR}$  (400 MHz,  $\text{CDCl}_3$ ):  $\delta$  (ppm) 7.93 (d,  $J = 7.9$  Hz, 3H), 7.82 (d,  $J = 7.3$  Hz, 1H), 7.47 (dt,  $J = 17.5, 8.8$  Hz, 4H), 7.29 (t,  $J = 7.5$  Hz, 1H);  $^{13}\text{C NMR}$  (100 MHz,  $\text{CDCl}_3$ ):  $\delta$  (ppm) 152.6, 150.6, 136.1, 135.5, 132.2, 130.6, 129.5, 126.6, 126.2, 125.3, 124.2, 118.5; **HRMS** (ESI)  $m/z$ : calcd for  $\text{C}_{14}\text{H}_9\text{ClN}_2\text{NaO}_2$   $[\text{M}+\text{Na}]^+$ , 295.0245, found 295.0239.

### 3-phenyl-5-(*m*-tolyl)-1,3,4-oxadiazol-2(3*H*)-one(4g)<sup>2</sup>

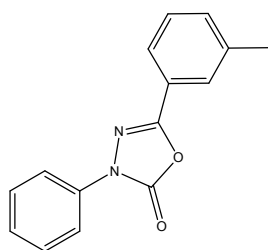

White solid, mp 126–128 °C;  $^1\text{H NMR}$  (400 MHz,  $\text{CDCl}_3$ ):  $\delta$  (ppm) 7.93 (d,  $J = 8.1$  Hz, 2H), 7.74 – 7.70 (m, 2H), 7.45 (t,  $J = 7.9$  Hz, 2H), 7.38 – 7.31 (m, 2H), 7.26 (t,  $J = 6.8$  Hz, 1H), 2.41 (s, 3H);  $^{13}\text{C NMR}$  (100 MHz,  $\text{CDCl}_3$ ):  $\delta$  (ppm) 153.9, 150.9, 139.1, 136.3, 132.9, 129.4, 129.1, 126.6, 126.2, 123.5, 123.3, 118.4, 21.5.

### 3-phenyl-5-(*o*-tolyl)-1,3,4-oxadiazol-2(3*H*)-one (4h)<sup>2</sup>

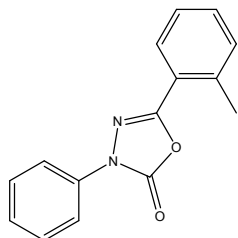

White solid, mp 95–97 °C;  $^1\text{H NMR}$  (400 MHz,  $\text{CDCl}_3$ ):  $\delta$  (ppm) 7.95 (d,  $J = 8.3$  Hz, 2H), 7.86 (d,  $J = 7.9$  Hz, 1H), 7.44 (dt,  $J = 19.9, 7.5$  Hz, 3H), 7.34 – 7.25 (m, 3H), 2.69 (s, 3H);  $^{13}\text{C NMR}$  (100 MHz,  $\text{CDCl}_3$ ):  $\delta$  (ppm) 154.1, 150.6, 138.3, 136.4, 132.1, 131.6, 129.4, 128.4, 126.5, 126.2, 122.3, 118.4, 22.4.

### 5-(furan-2-yl)-3-phenyl-1,3,4-oxadiazol-2(3*H*)-one (4i)<sup>3</sup>

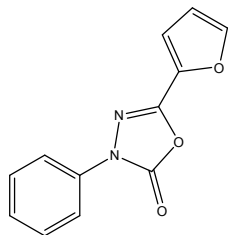

Brown solid, mp 106–108 °C;  $^1\text{H NMR}$  (400 MHz,  $\text{CDCl}_3$ ):  $\delta$  (ppm) 7.92 (d,  $J = 8.1$  Hz, 2H), 7.65 (s, 1H), 7.46 (t,  $J = 7.9$  Hz, 2H), 7.30 – 7.26 (m, 1H), 7.09 (d,  $J = 3.4$  Hz, 1H), 6.61 – 6.60 (m, 1H);  $^{13}\text{C NMR}$  (100 MHz,  $\text{CDCl}_3$ ):  $\delta$  (ppm) 150.0, 147.1, 146.2, 138.8, 136.1, 129.4, 126.5, 118.5, 114.7, 112.3.

### 3-phenyl-5-(thiophen-2-yl)-1,3,4-oxadiazol-2(3H)-one (4j)<sup>2</sup>

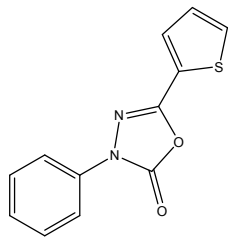

Brown solid, mp 134–136 °C; <sup>1</sup>H NMR (400 MHz, CDCl<sub>3</sub>): δ (ppm) 7.91 (d, *J* = 7.9 Hz, 2H), 7.68 (s, 1H), 7.55 (d, *J* = 4.6 Hz, 1H), 7.45 (t, *J* = 7.6 Hz, 2H), 7.27 (t, *J* = 6.5 Hz, 1H), 7.15 (s, 1H); <sup>13</sup>C NMR (100 MHz, CDCl<sub>3</sub>): δ (ppm) 150.6, 150.3, 136.1, 130.4, 130.1, 129.4, 128.3, 126.4, 125.2, 118.5.

### methyl 1,3-diphenyl-4,5-dihydro-1H-pyrazole-5-carboxylate (5a)

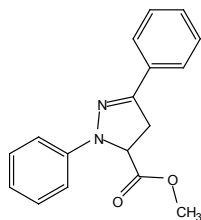

White solid, mp 97–99 °C; <sup>1</sup>H NMR (400 MHz, CDCl<sub>3</sub>): δ 7.67 (d, *J* = 7.0 Hz, 2H), 7.36 – 7.23 (m, 5H), 7.09 (d, *J* = 7.7 Hz, 2H), 6.85 (t, *J* = 6.9 Hz, 1H), 4.75 (dd, *J* = 12.4, 6.4 Hz, 1H), 3.69 (s, 3H), 3.62 – 3.52 (m, 1H), 3.35 (dd, *J* = 17.0, 6.3 Hz, 1H); <sup>13</sup>C NMR (100 MHz, CDCl<sub>3</sub>): δ 172.1, 147.1, 144.7, 132.1, 129.3, 129.0, 128.7, 126.0, 119.9, 113.0, 61.7, 52.8, 38.3; HRMS (ESI) *m/z*: calcd for C<sub>17</sub>H<sub>17</sub>N<sub>2</sub>O<sub>2</sub> [M+Na]<sup>+</sup>, 281.1285, found 281.1286.

## 5. Reference

- (1) W. Kuldeep, C. Yang, P. R. West, K. C. Deming, S. R. Chemburkar and R. E. Reddy, *Synth. Commun.*, 2008, **38**, 4434.
- (2) Y. Wang, X. Meng, Y.-T. Yang, L.-T. Zhang, S.-B. Guo, D. Tang, Y.-X. Li and B.-H. Chen, *Chem. Commun.*, 2015, **51**, 1905.
- (3) C.-X. Guo, W.-Z. Zhang, N. Zhang and X.-B. Lu, *J. Org. Chem.*, 2017, **82**, 7637.

## 6. NMR spectra

3a

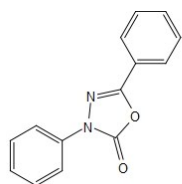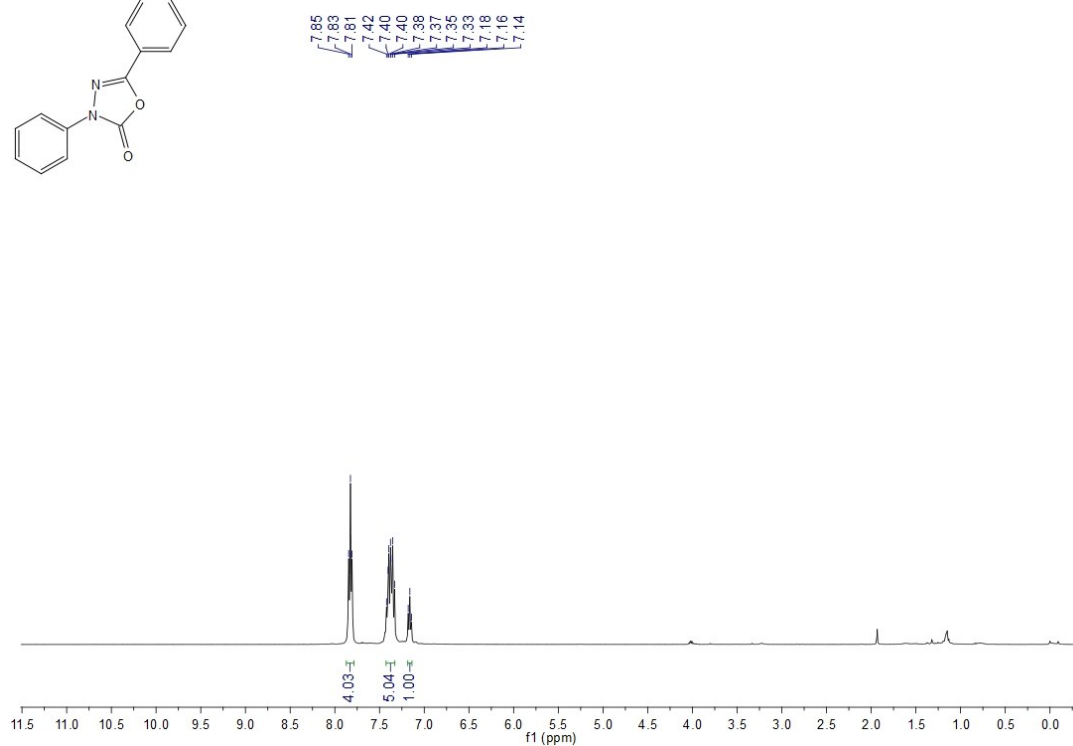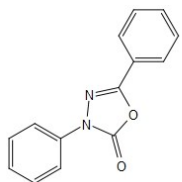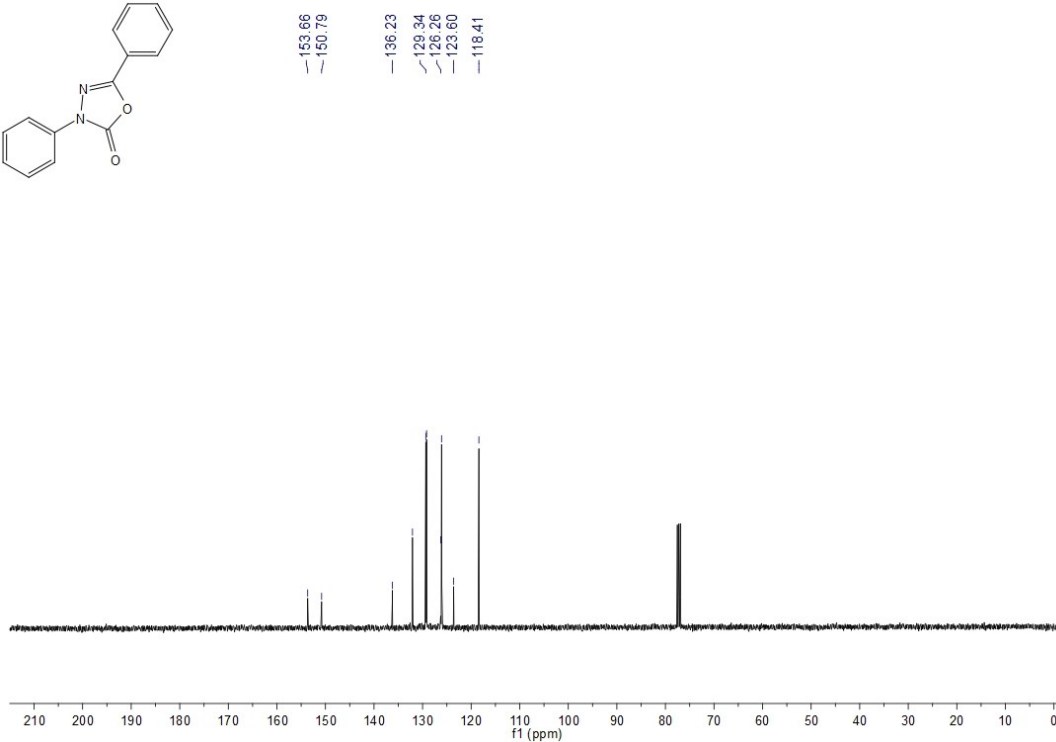

3b

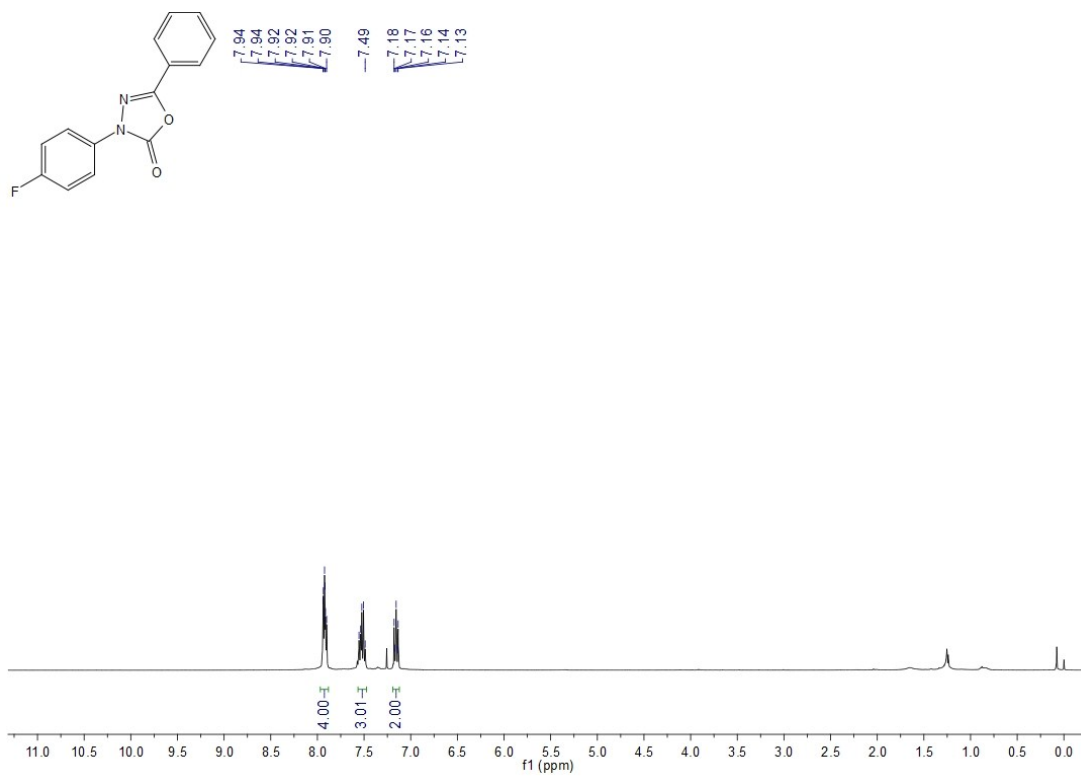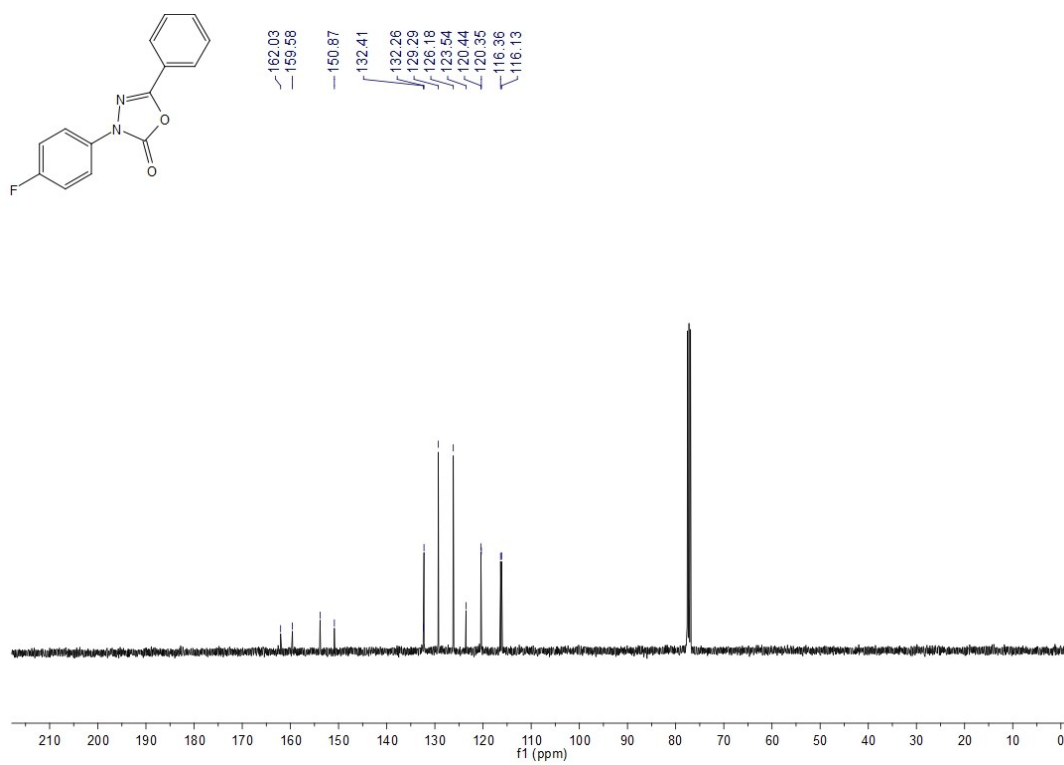

3c

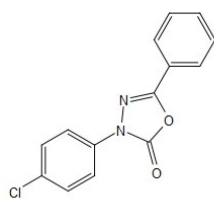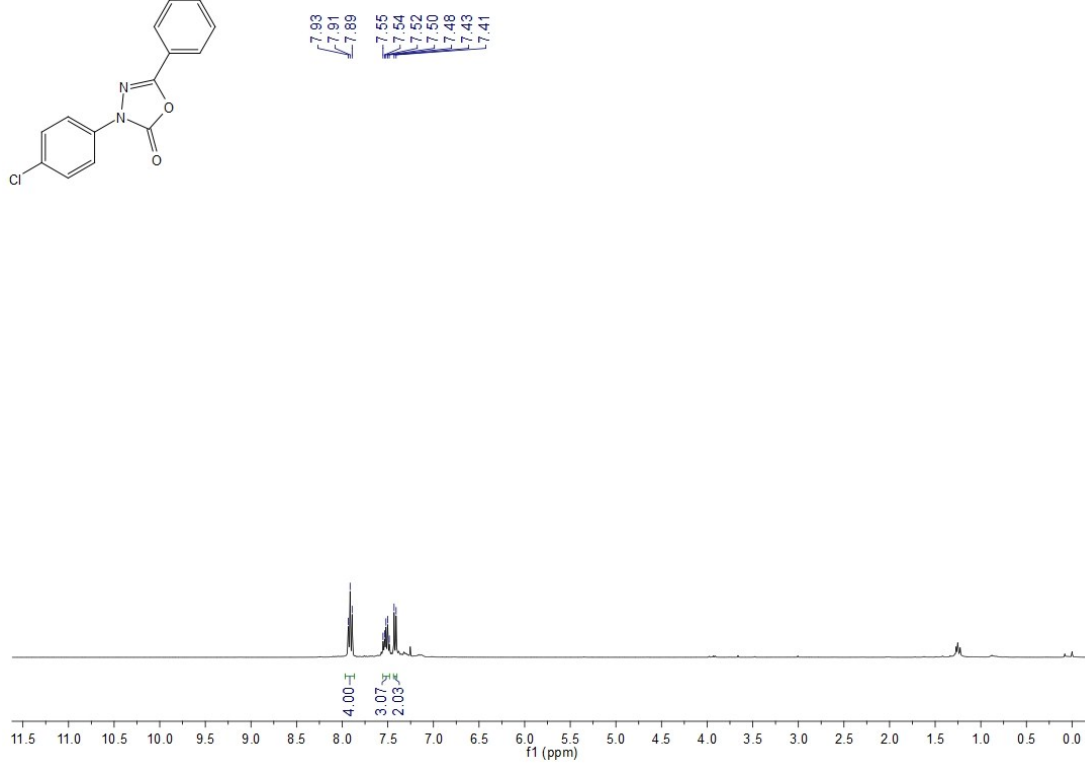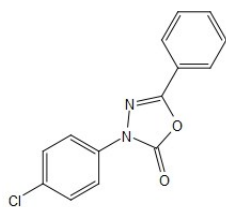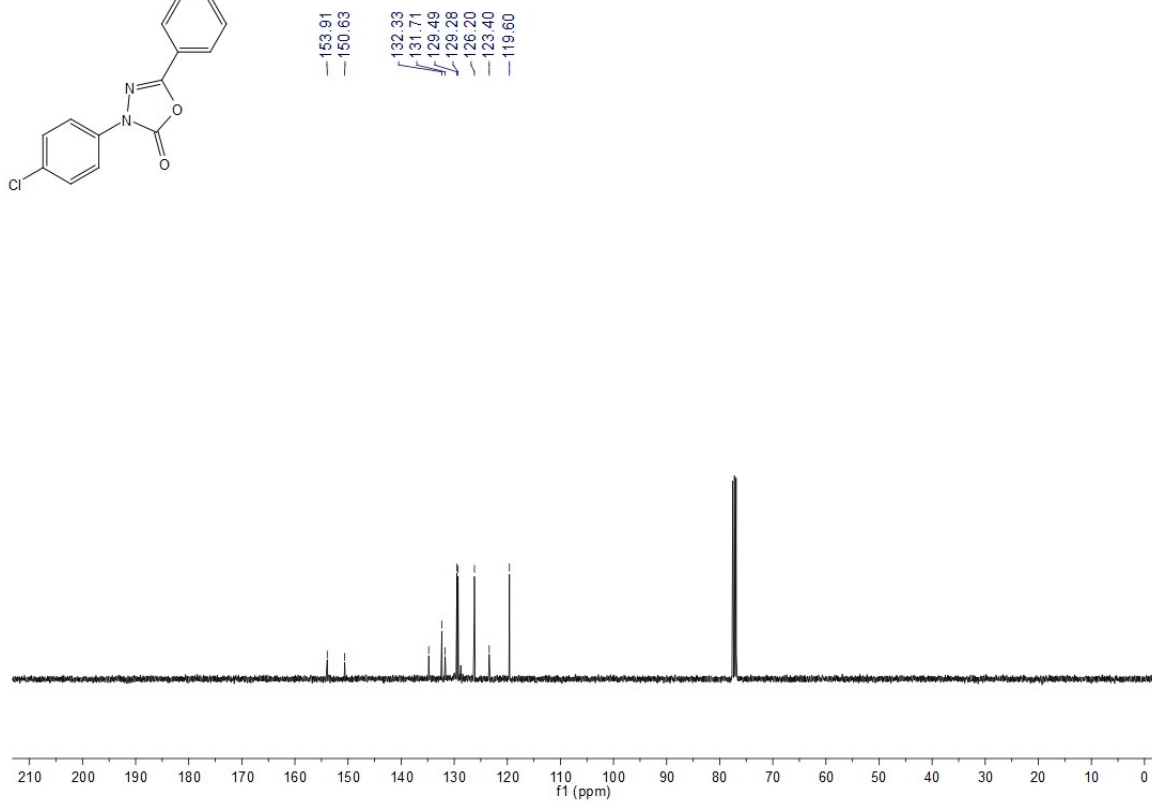

3d

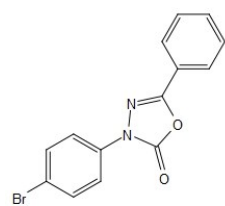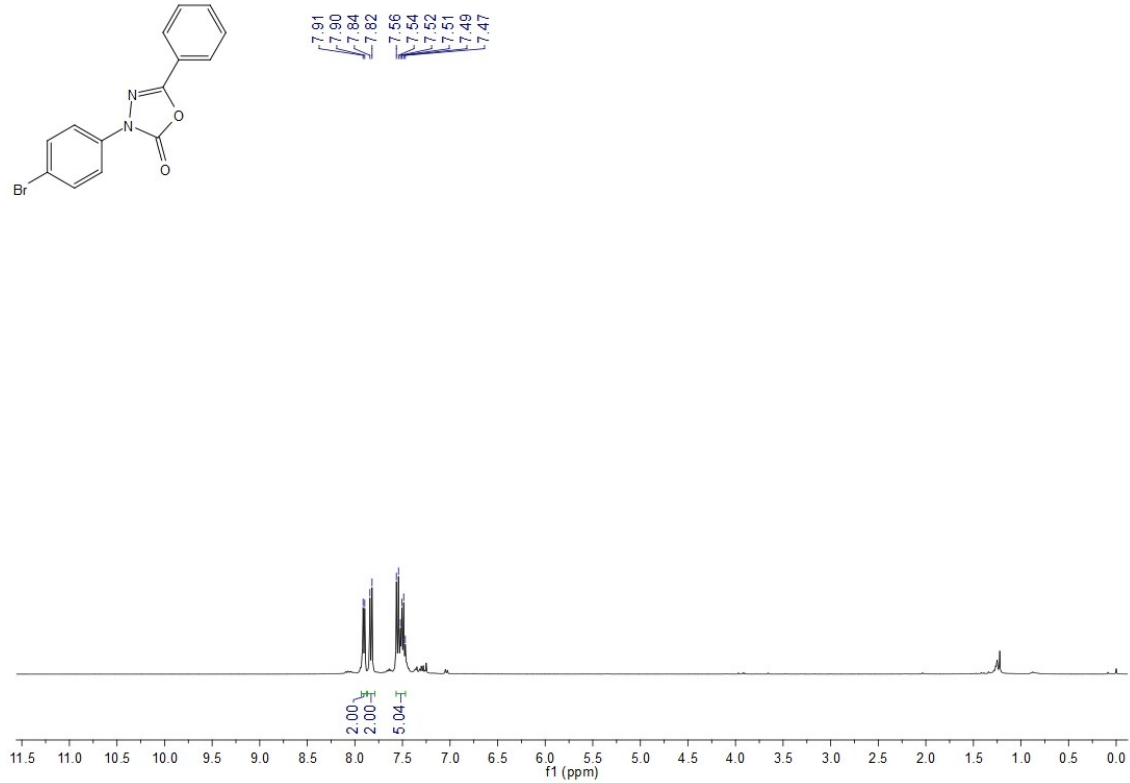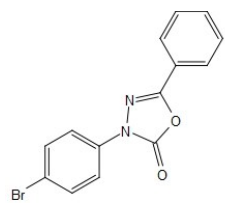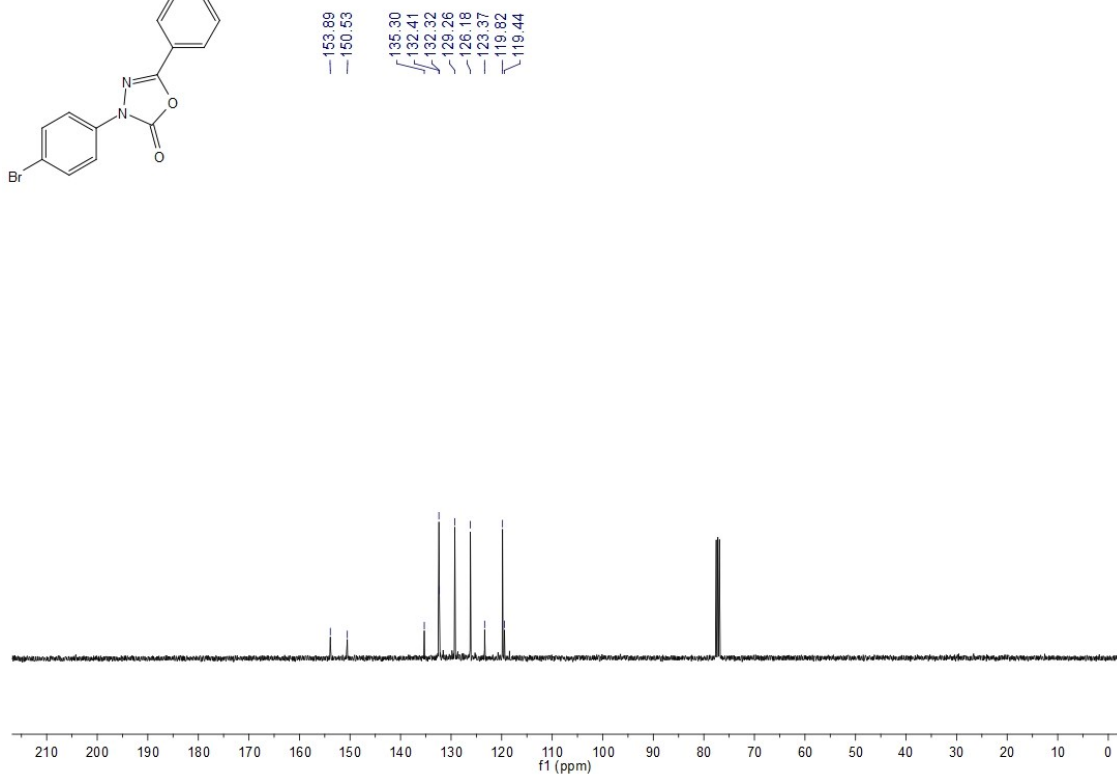

3e

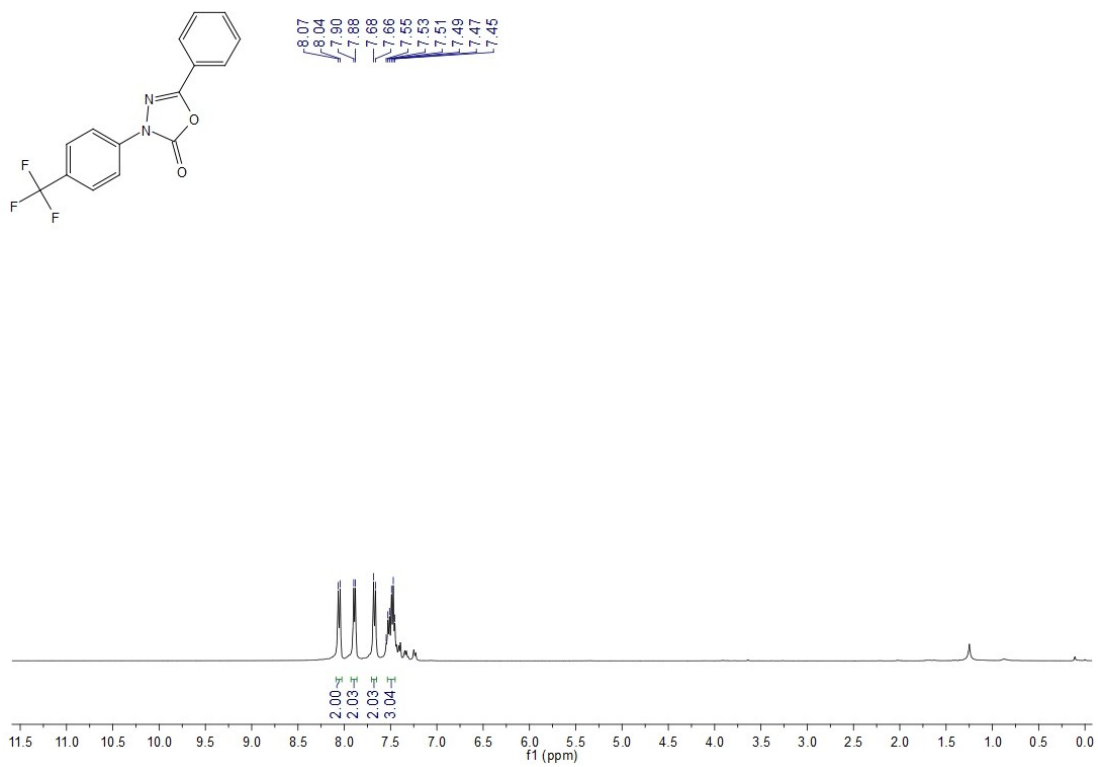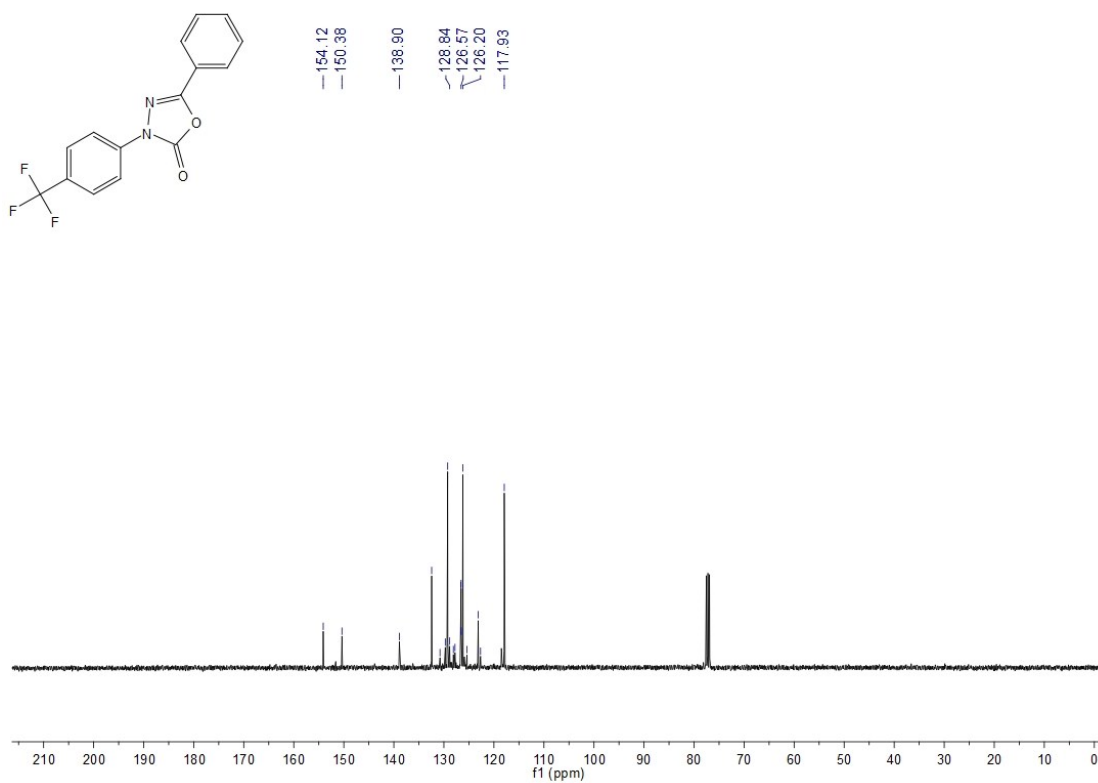

3f



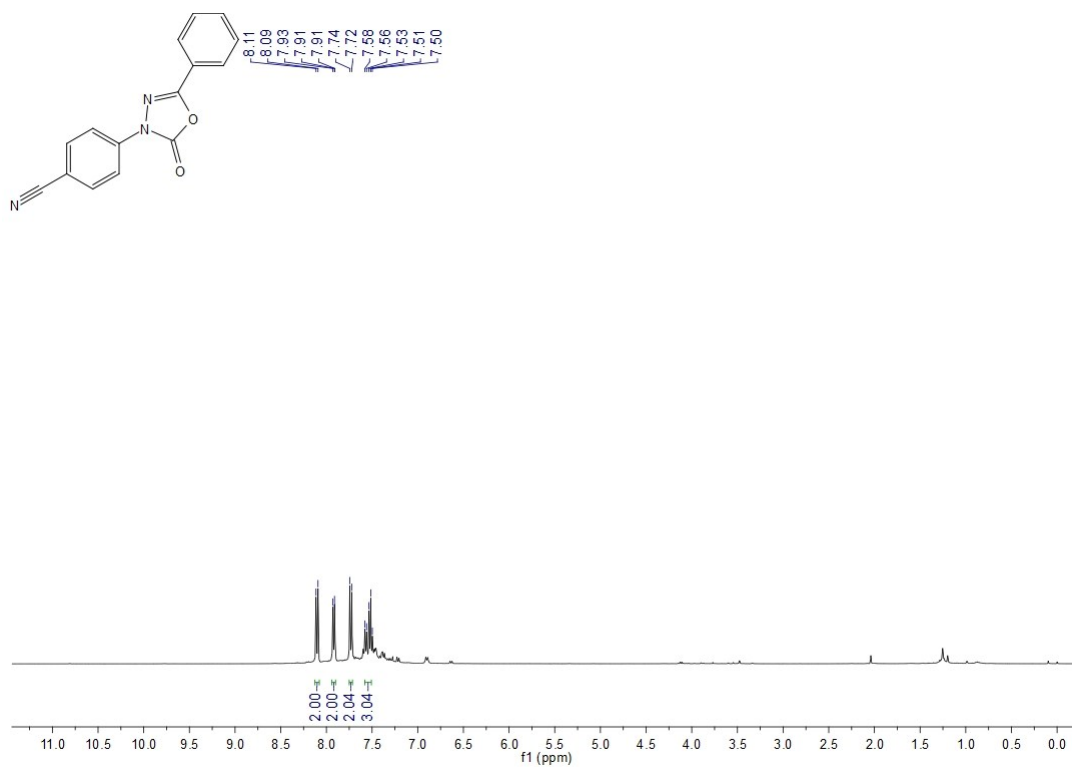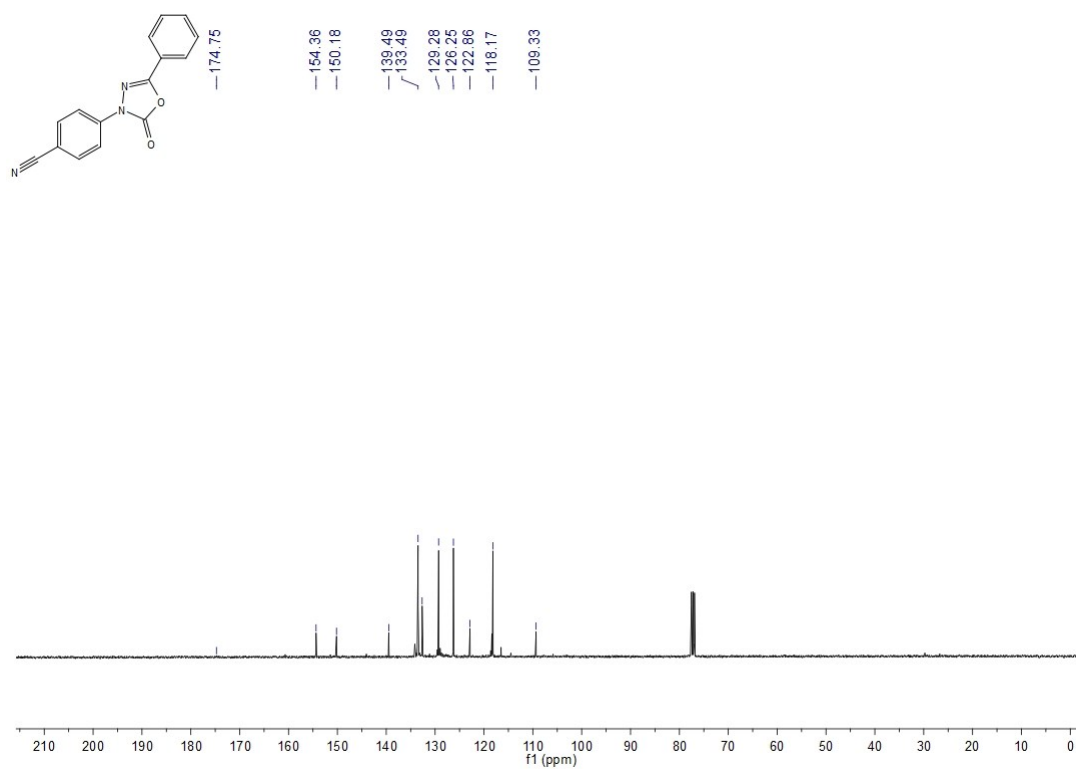

3g

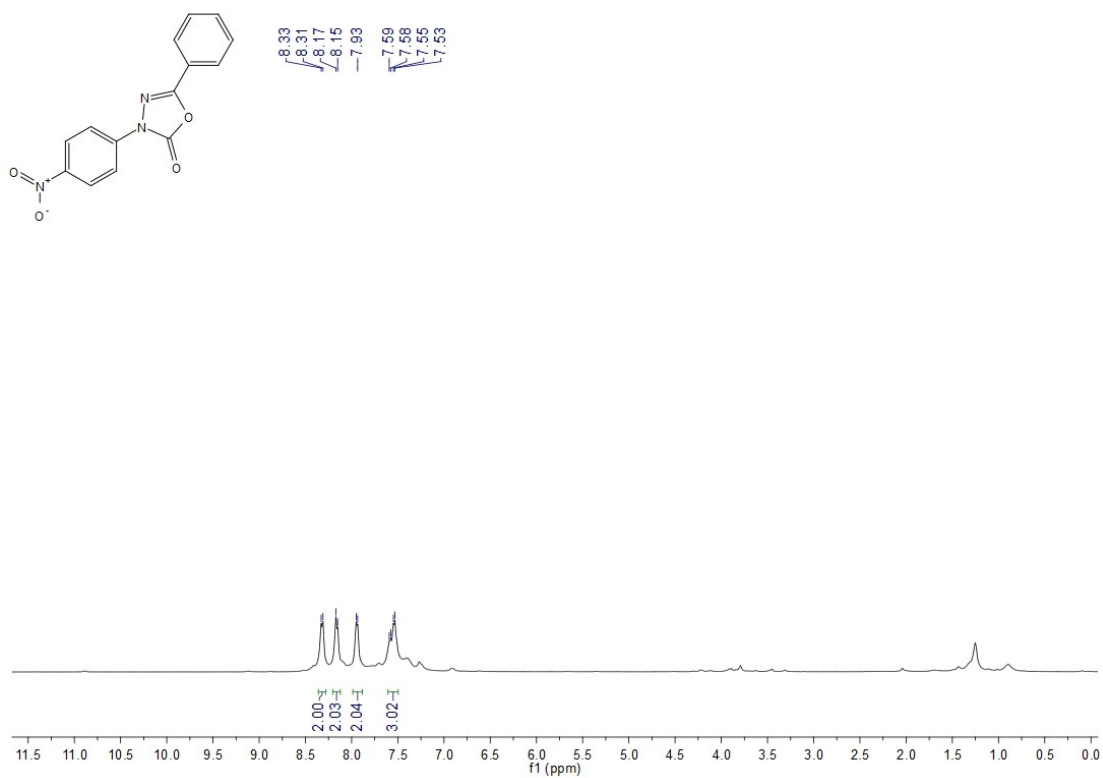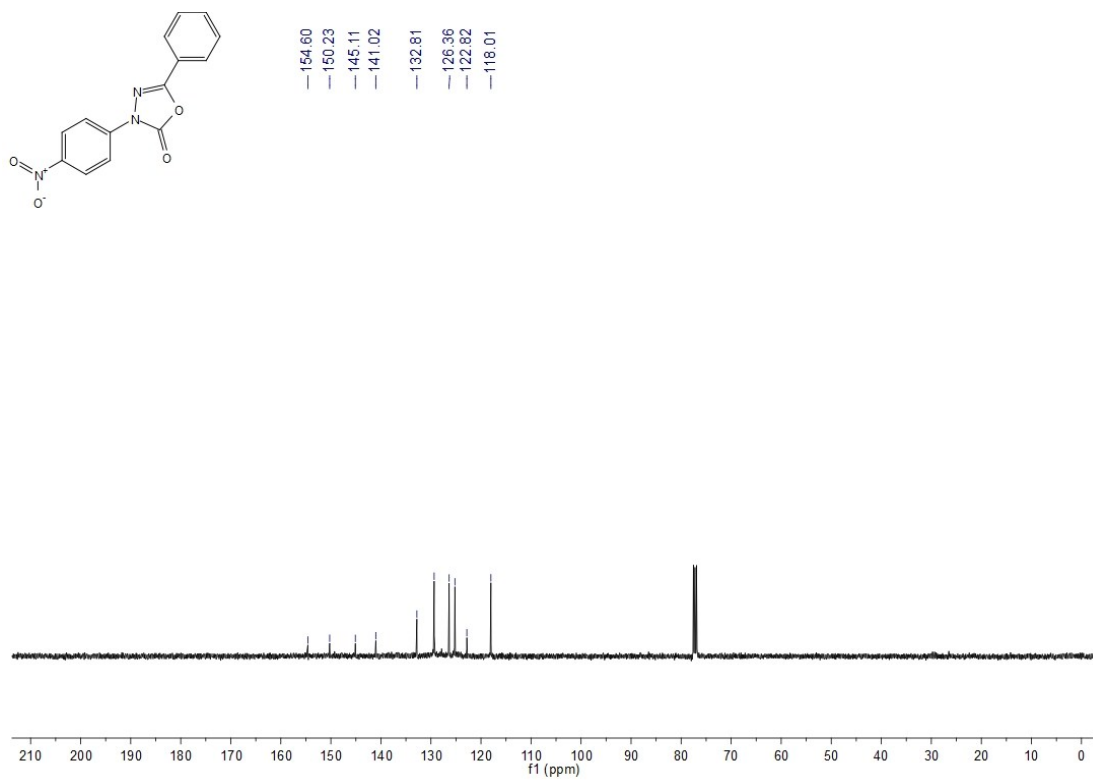

3h

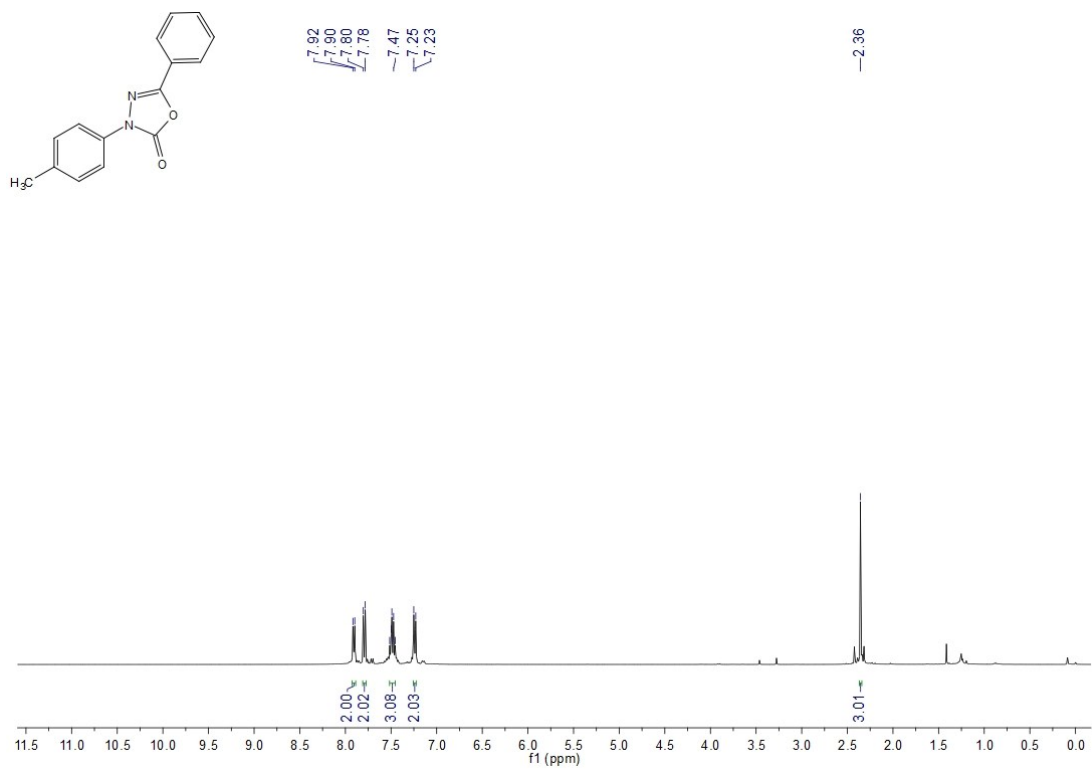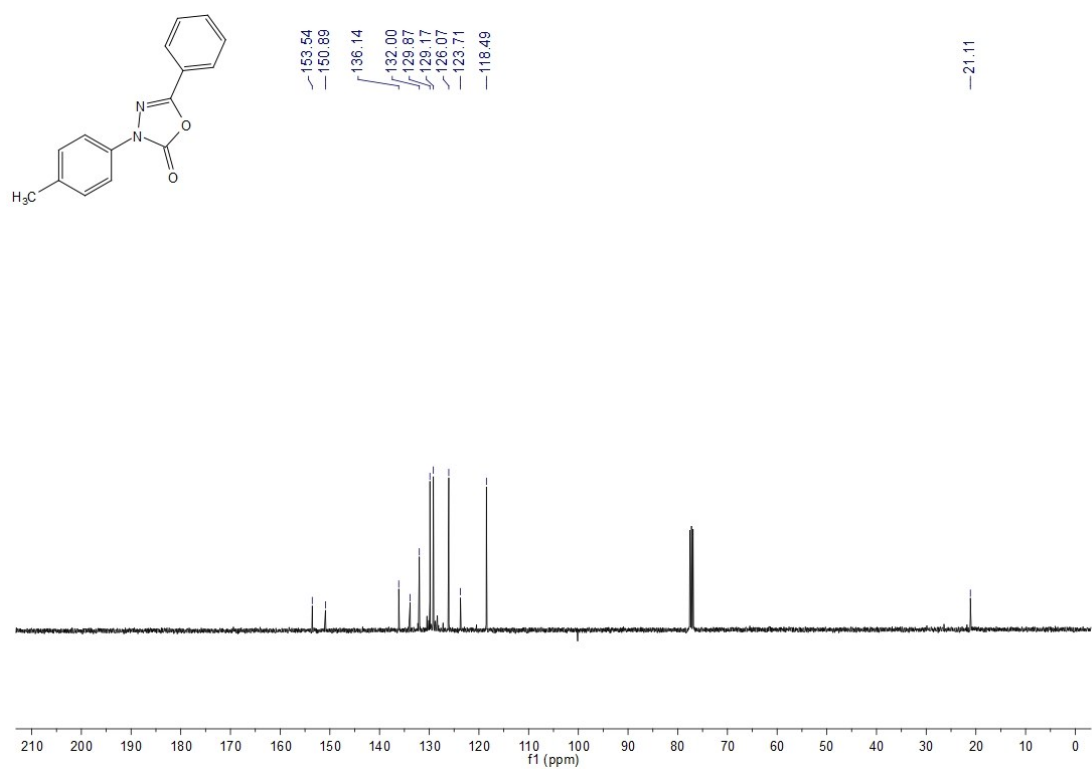

3i

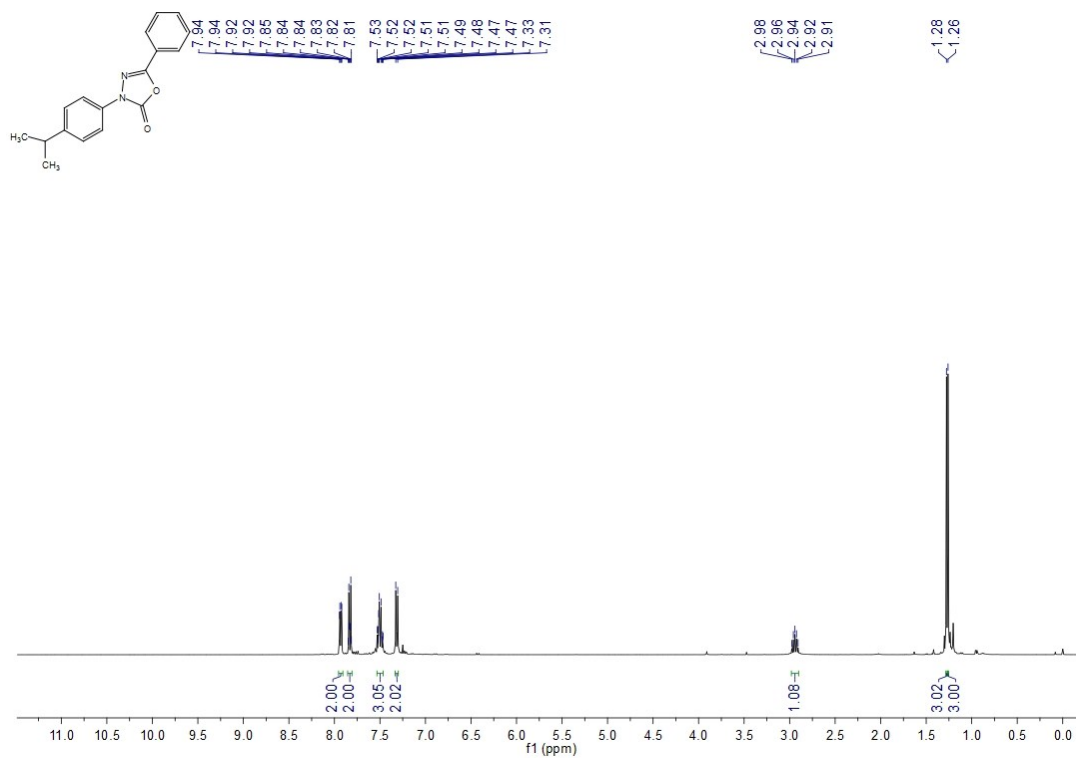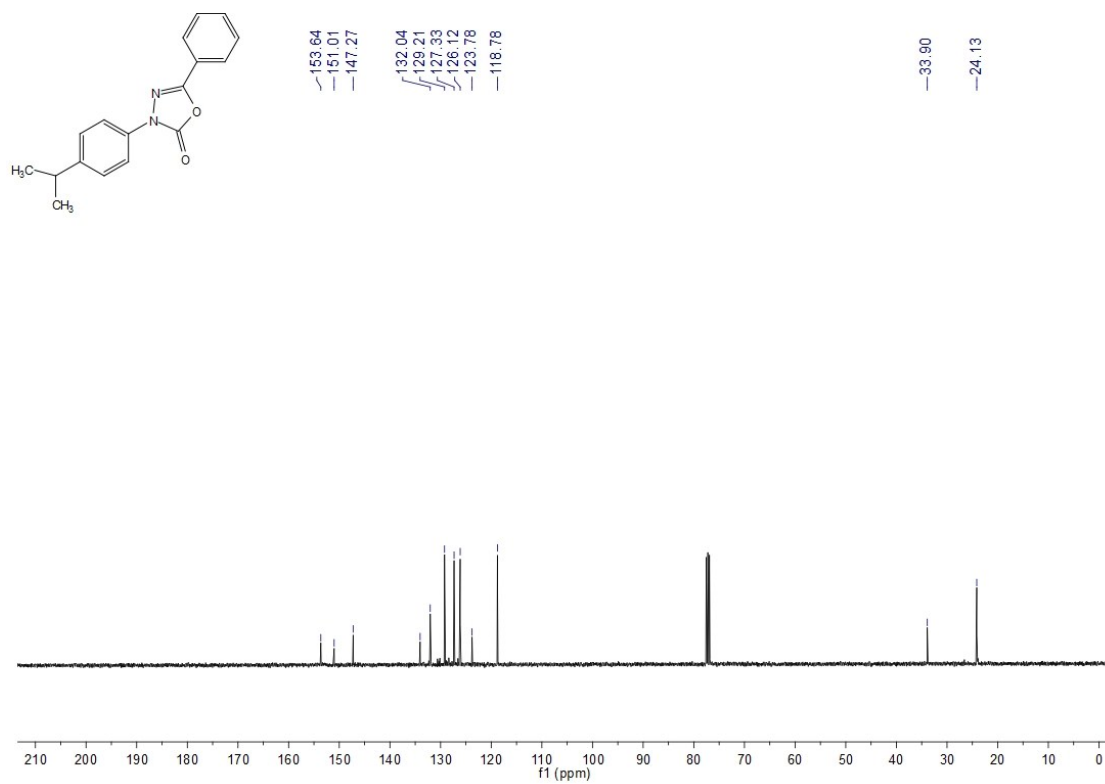

3j

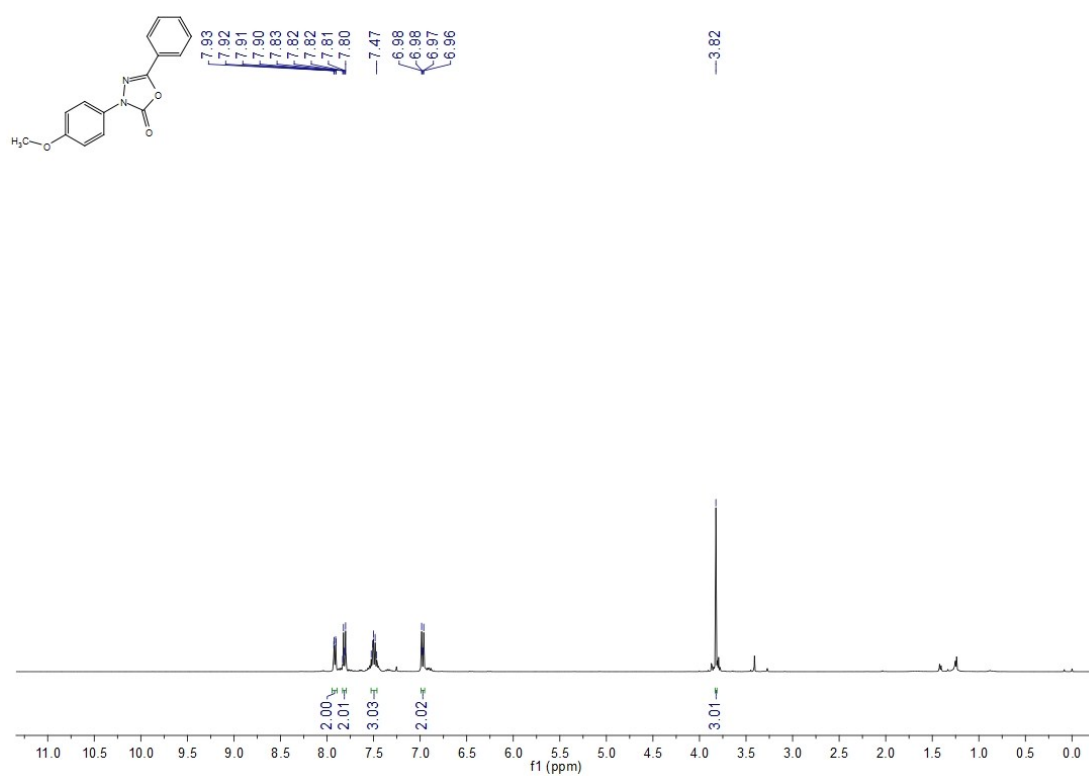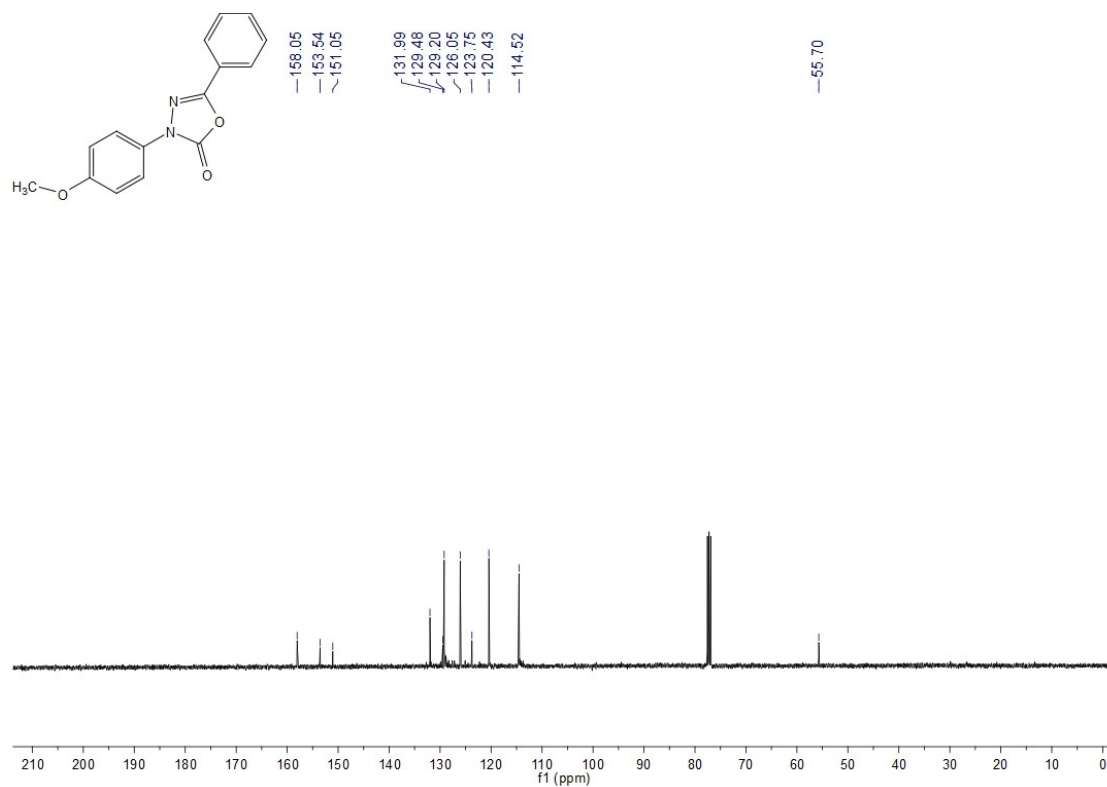

3k

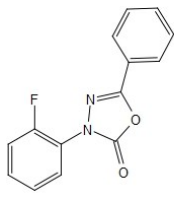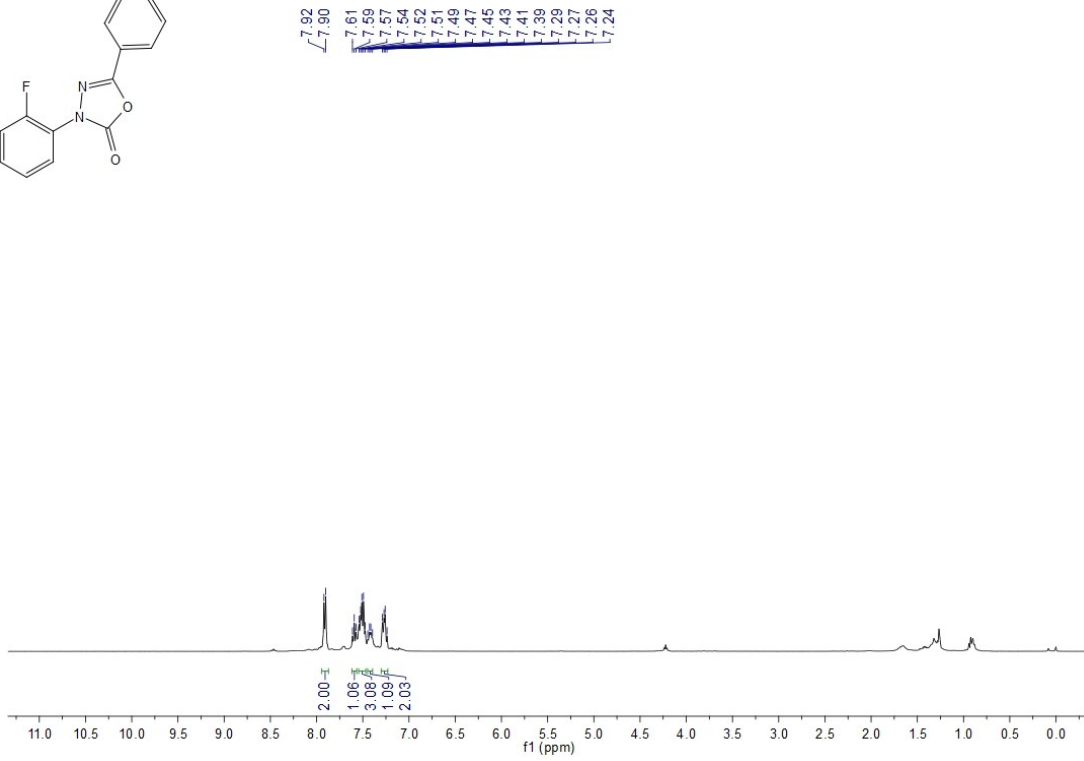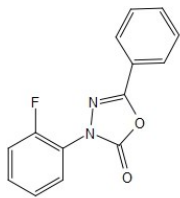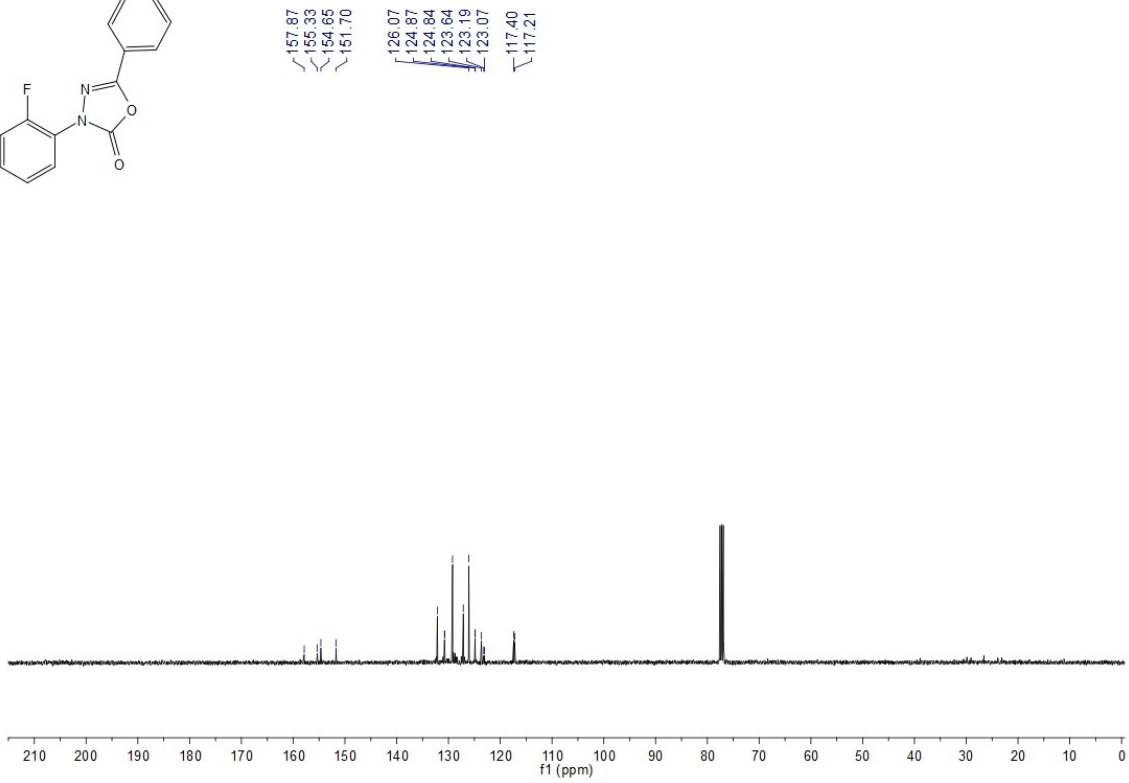

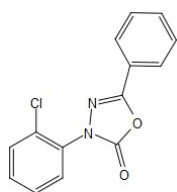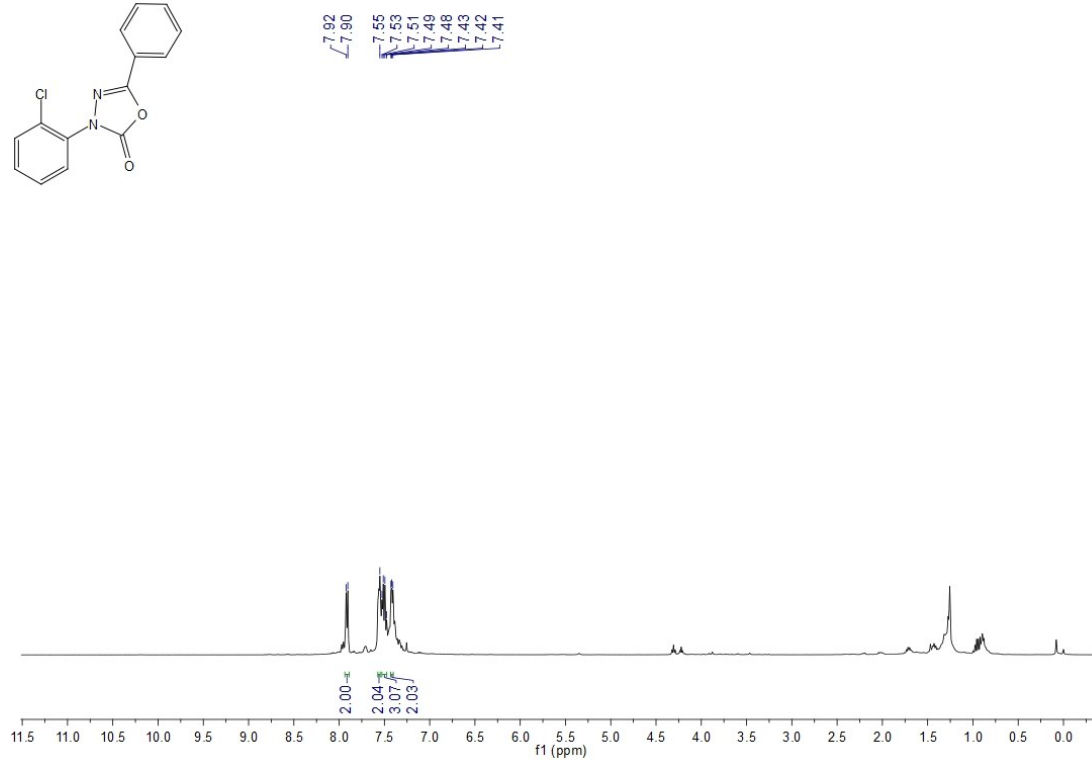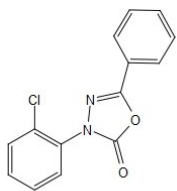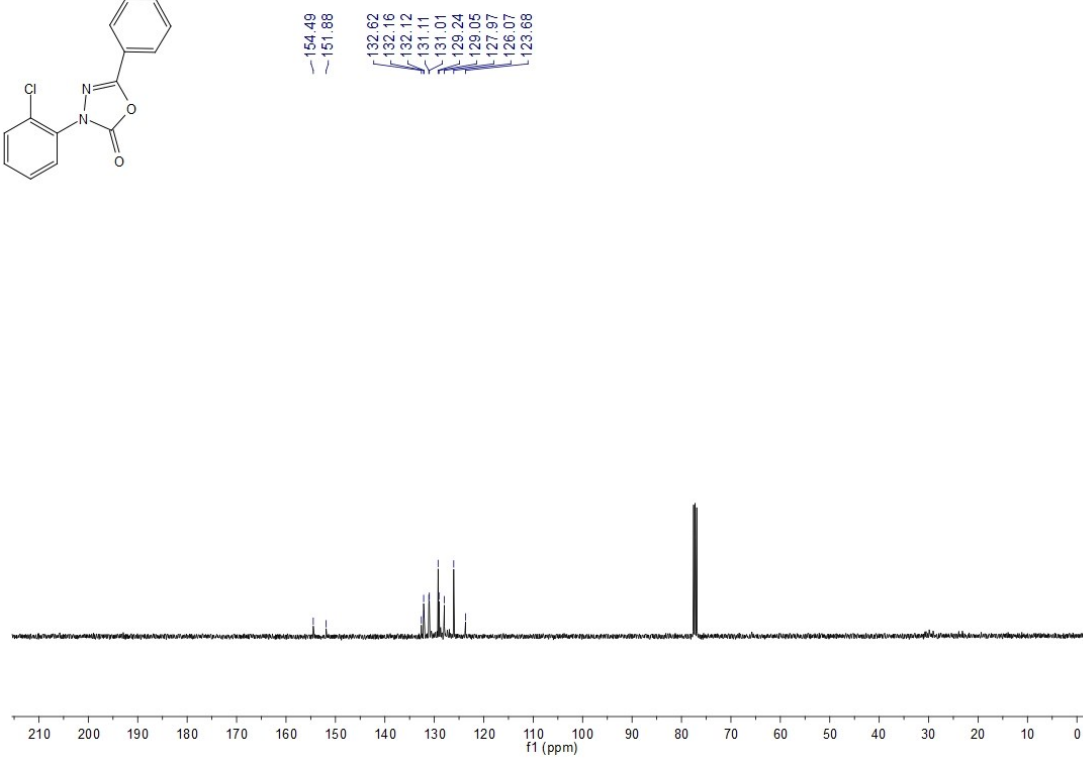

3m

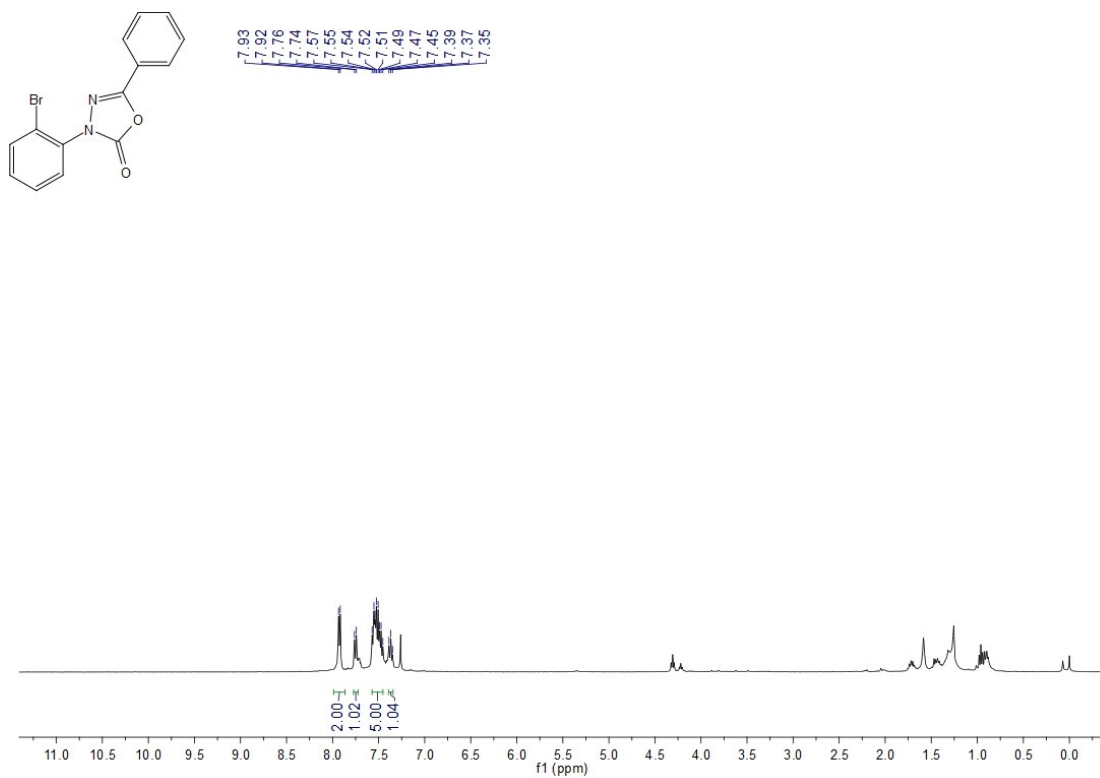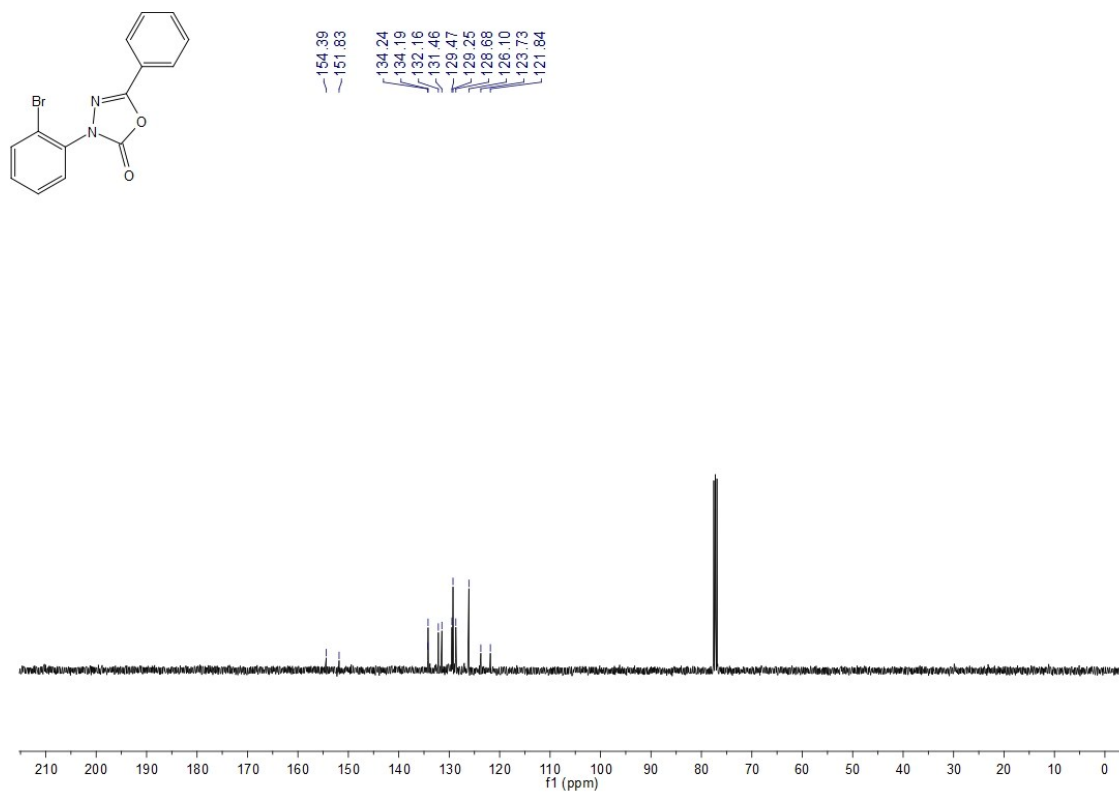

3n



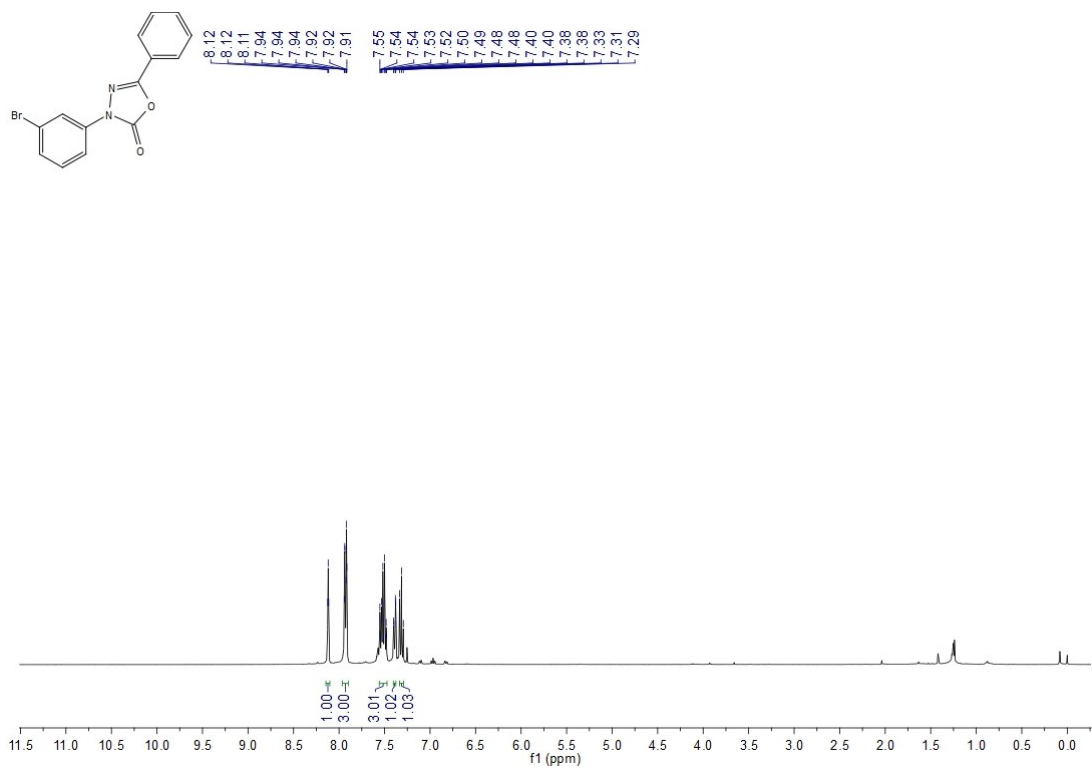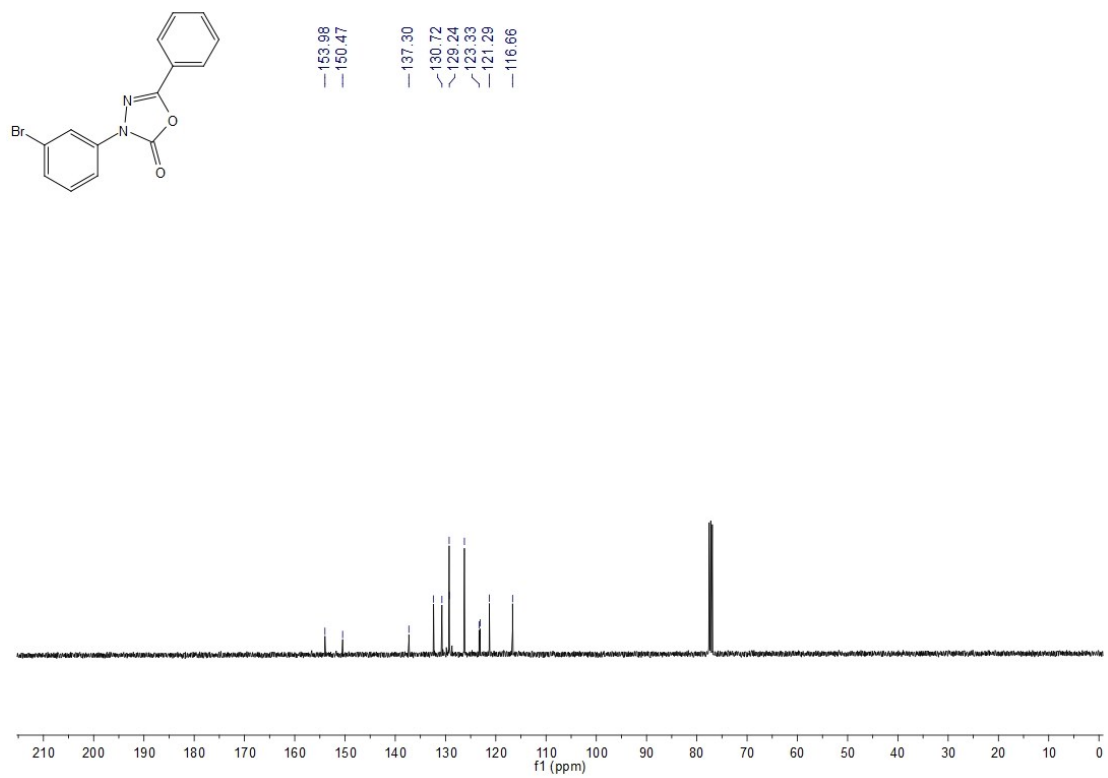

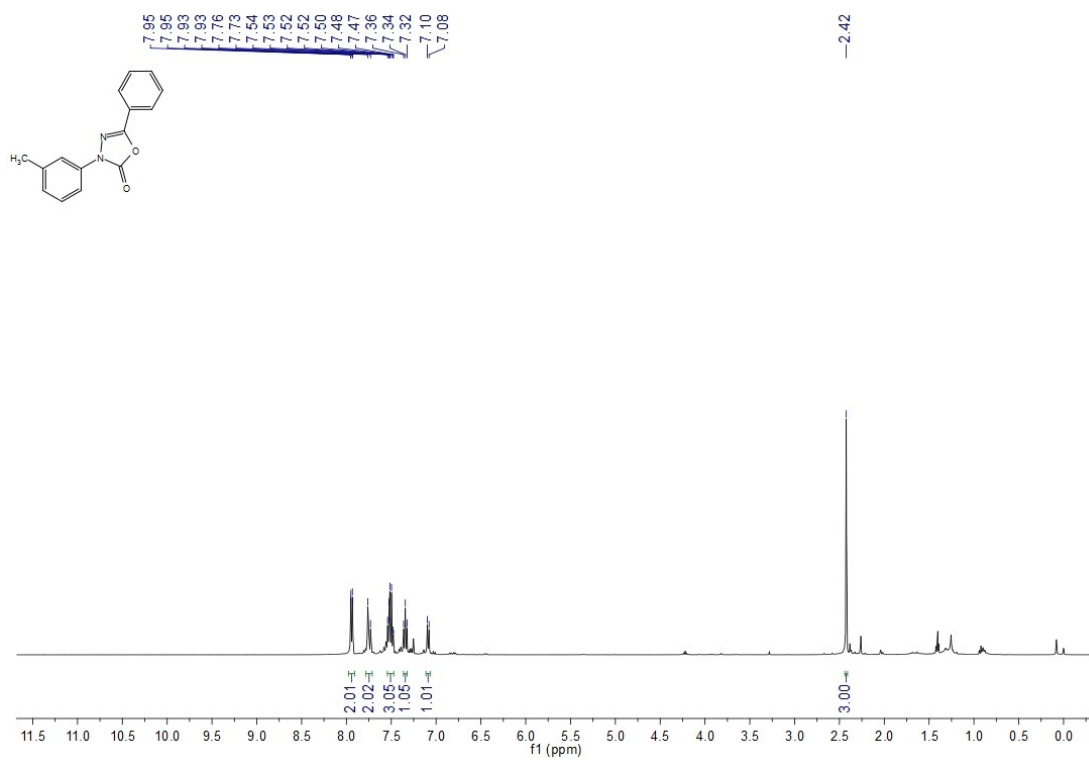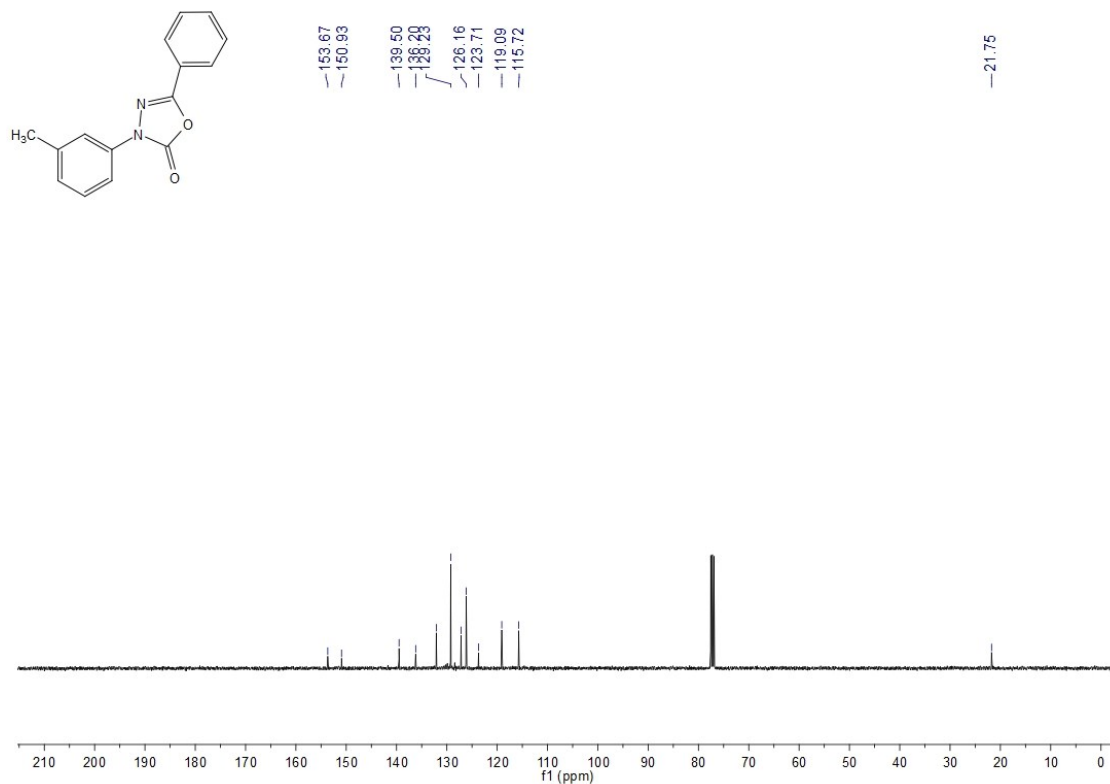

3p

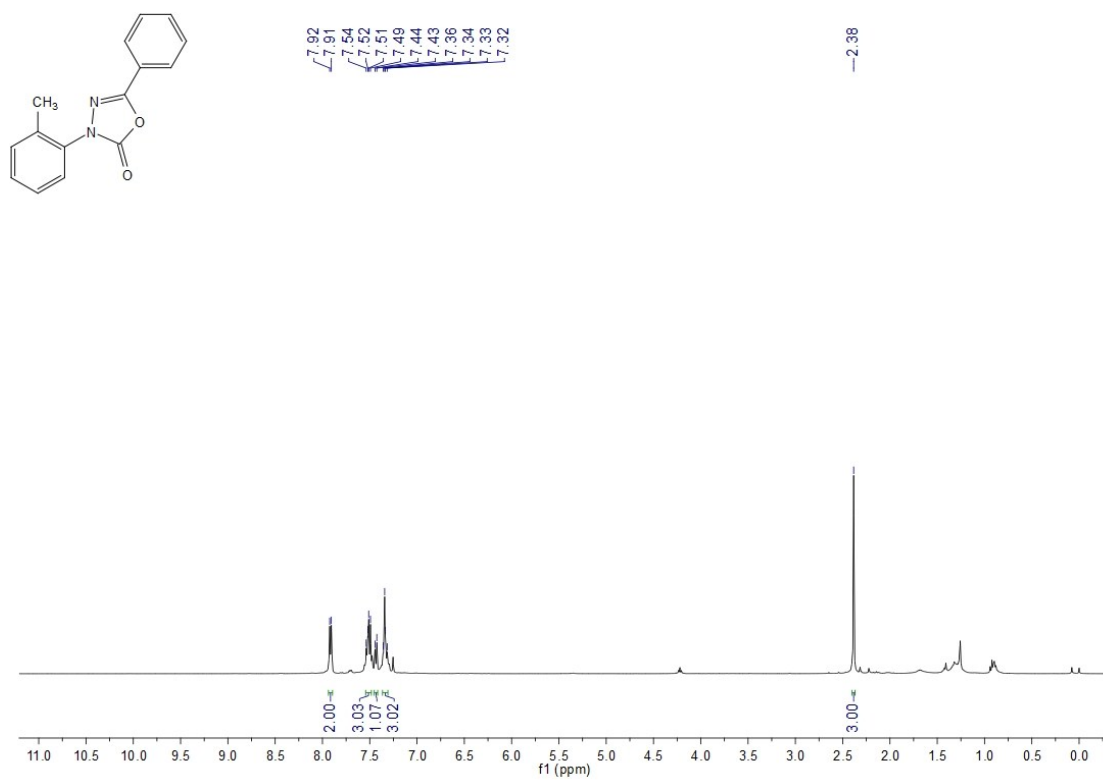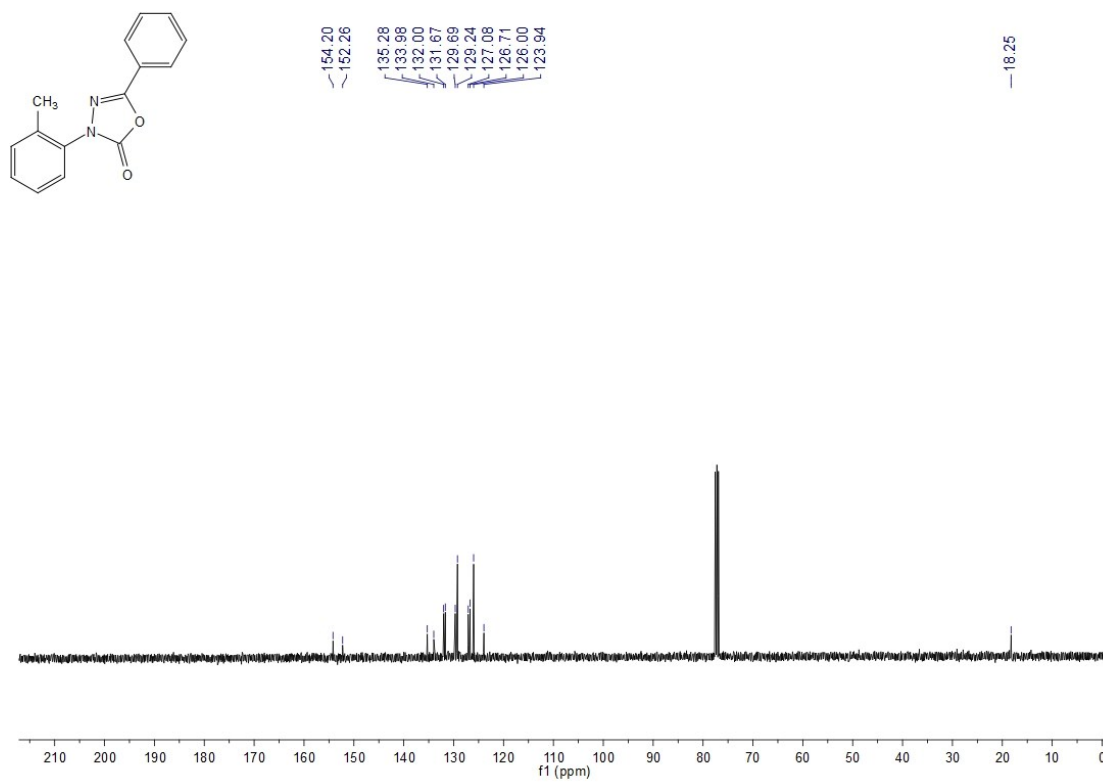

3q

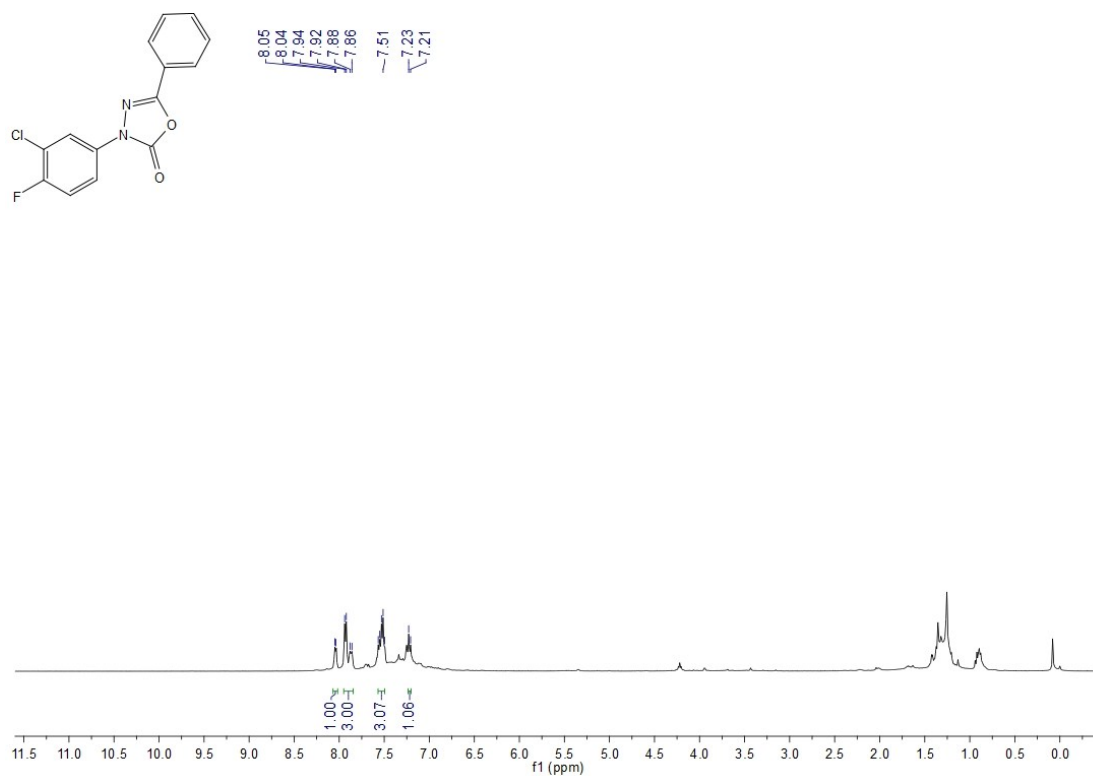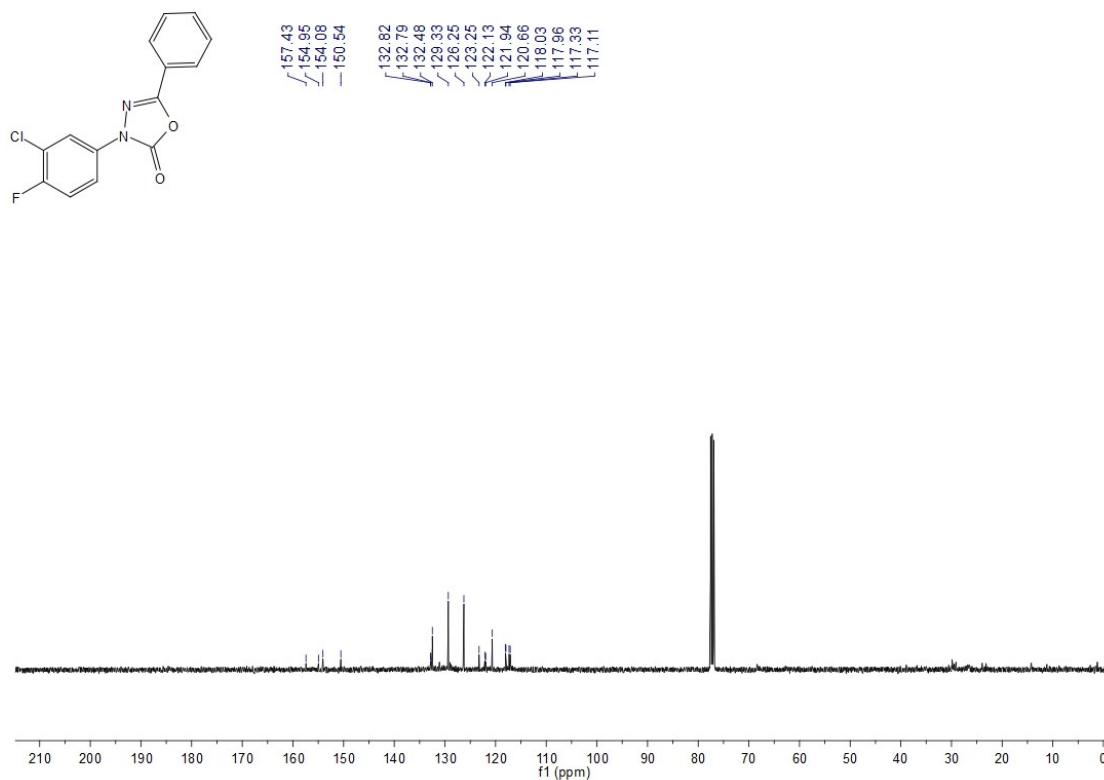

3r

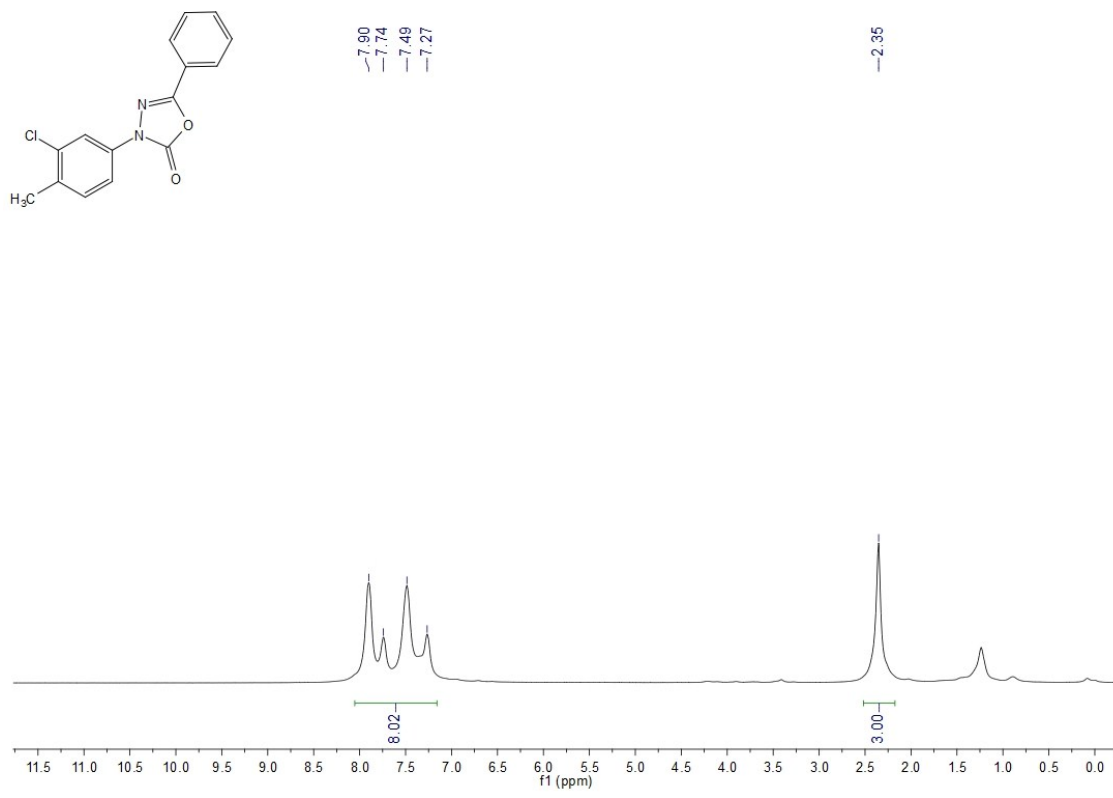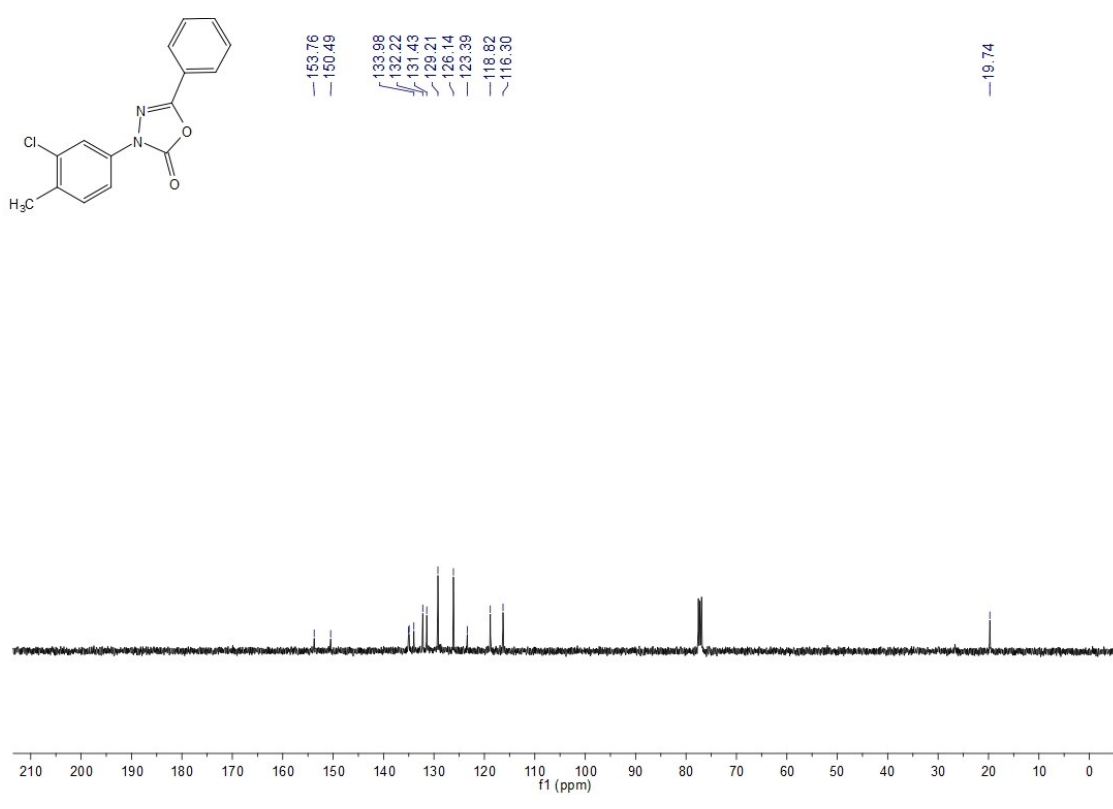

3s

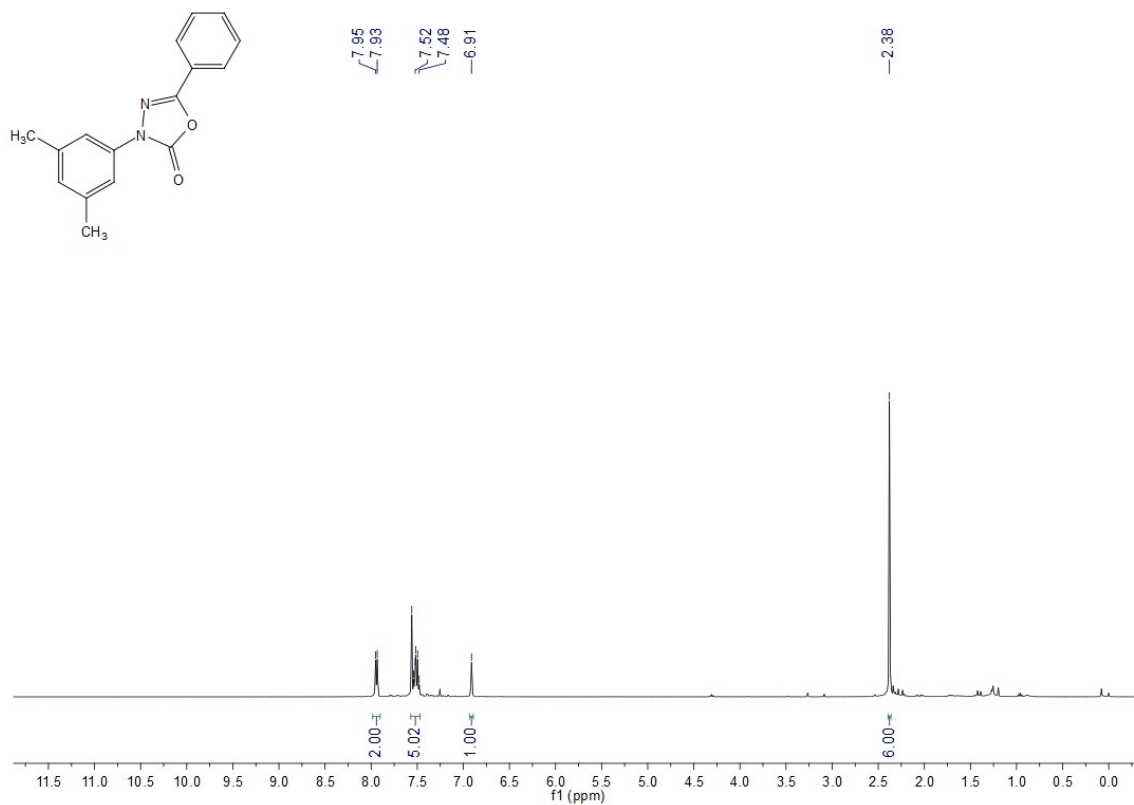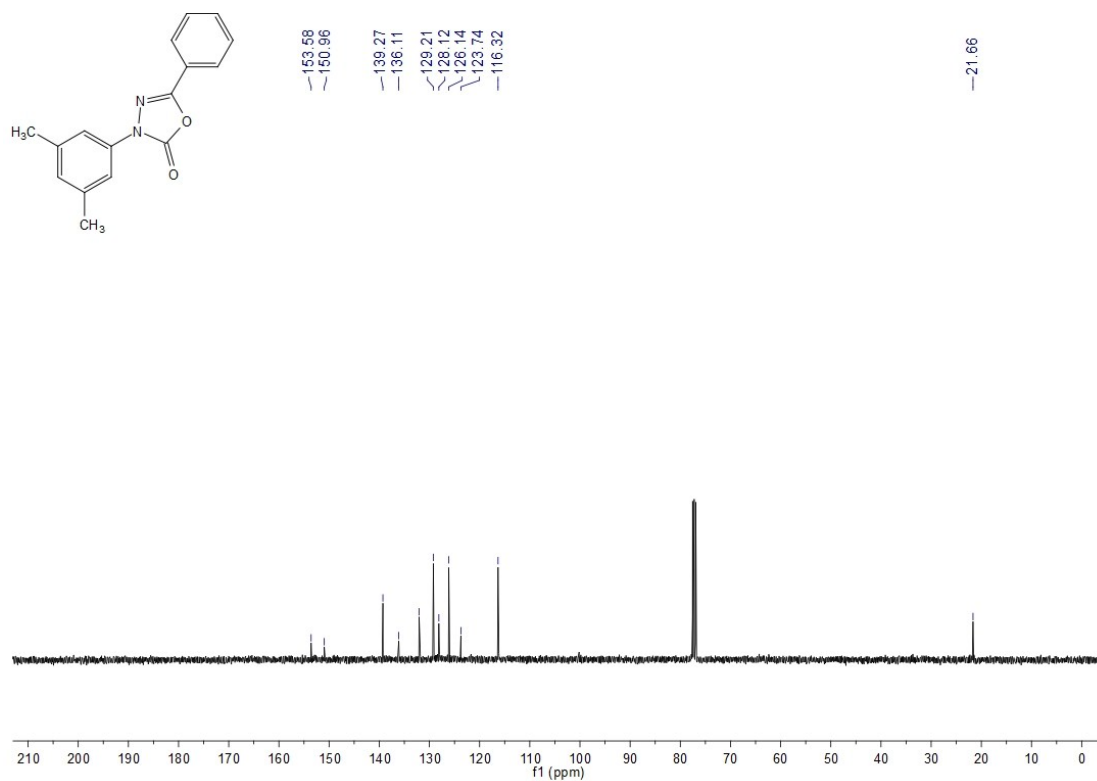

4a

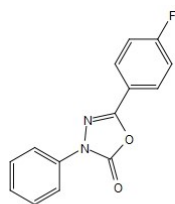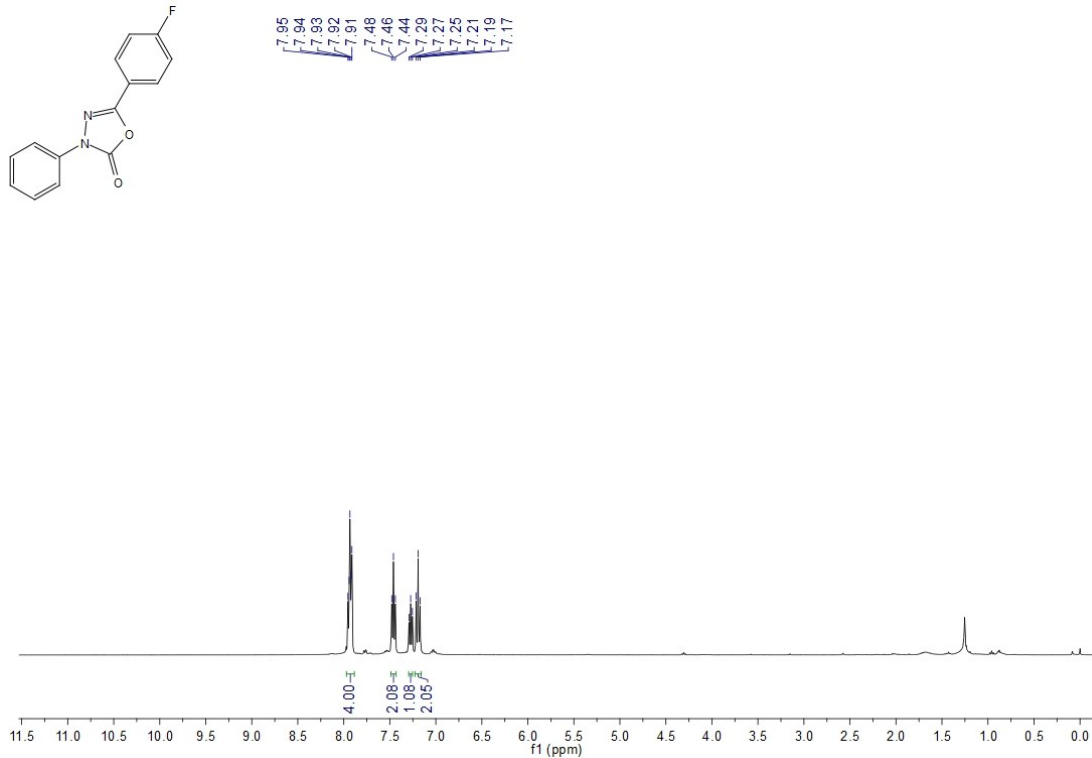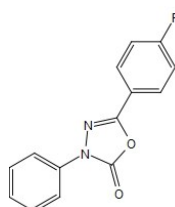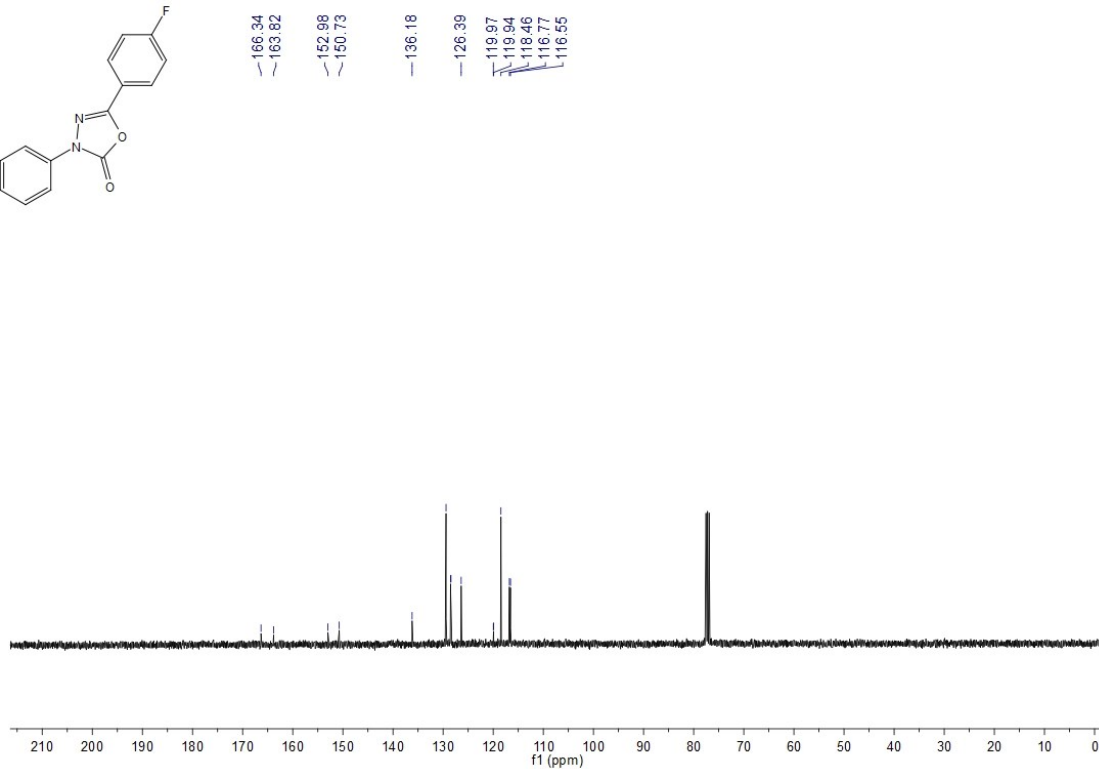

4b

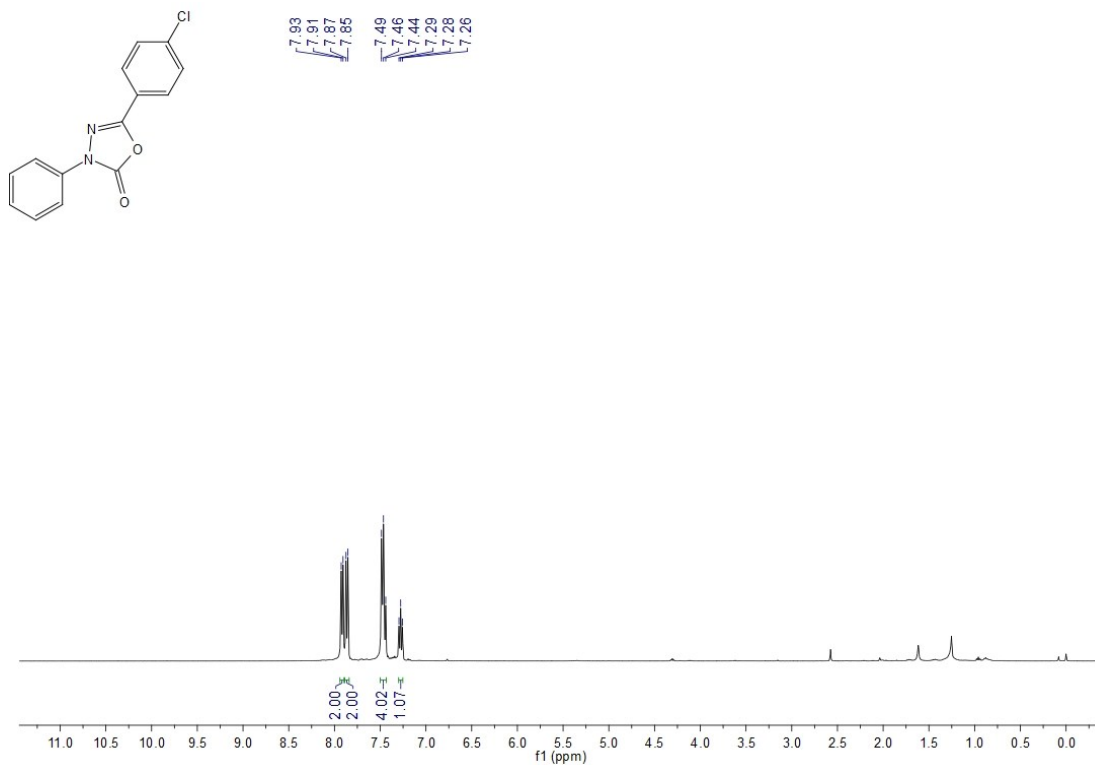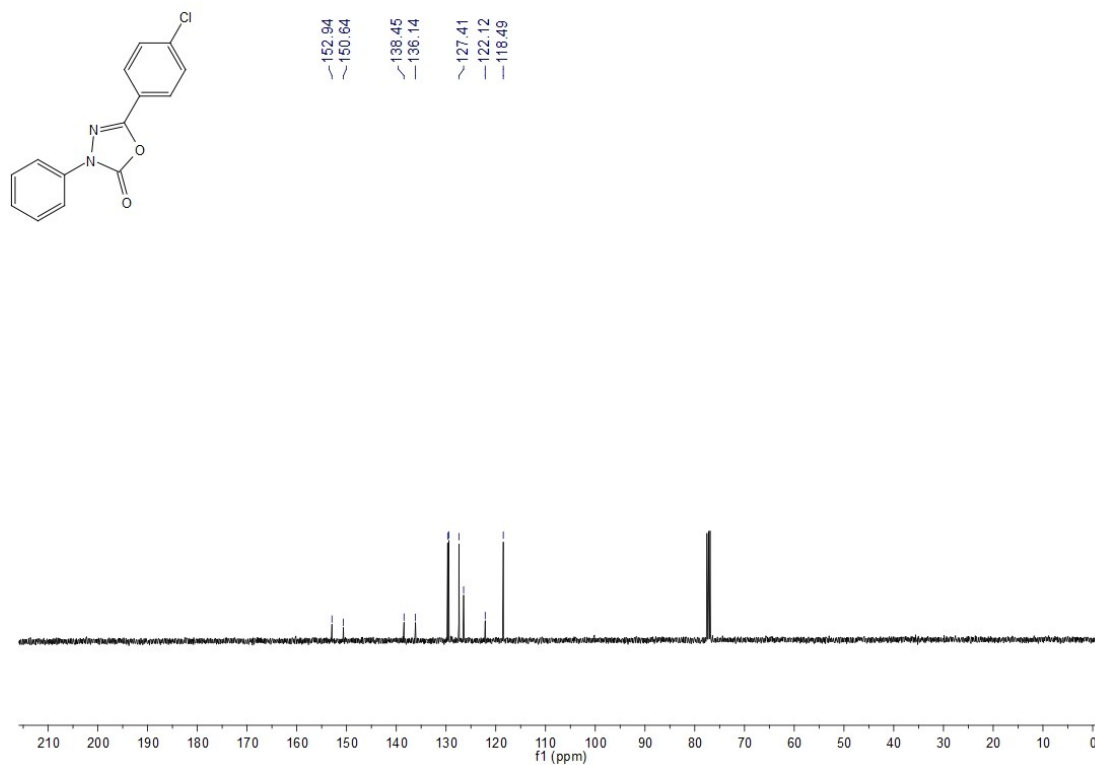

4c



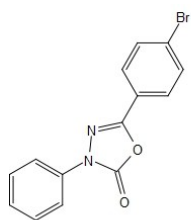

7.94  
7.91  
7.82  
7.80  
7.66  
7.64  
7.49  
7.47  
7.45  
7.31  
7.29  
7.27  
7.26

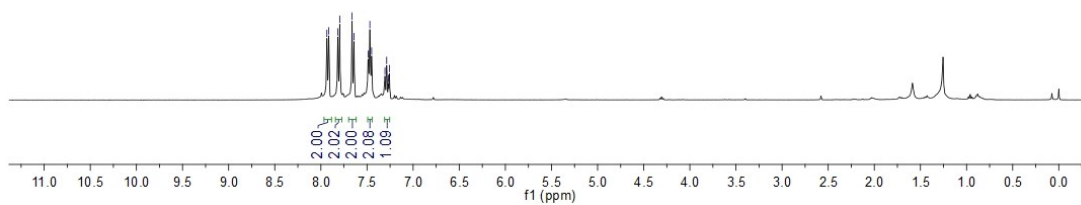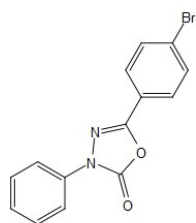

153.07  
150.67  
136.16  
127.56  
126.52  
122.60  
118.55

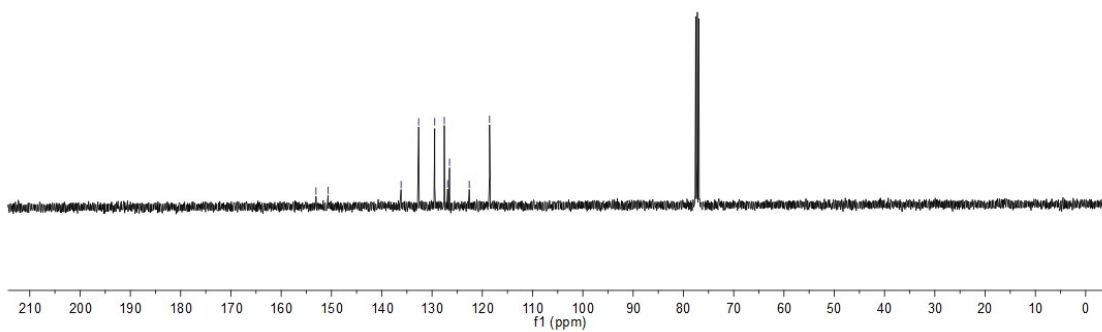

4d

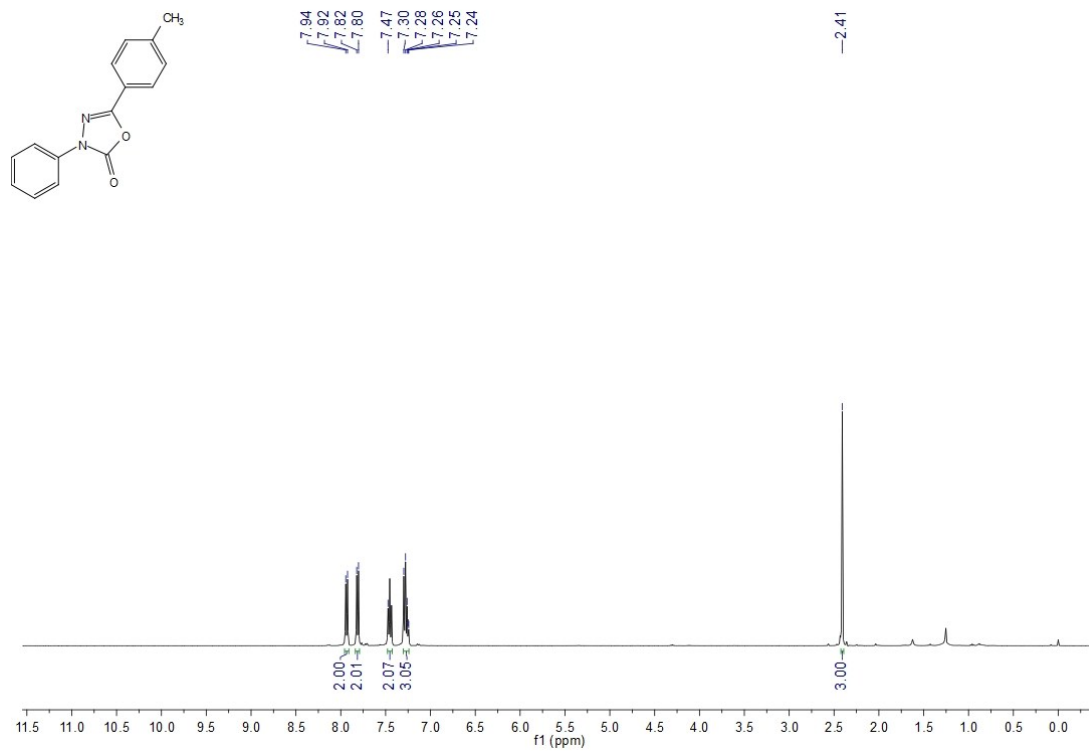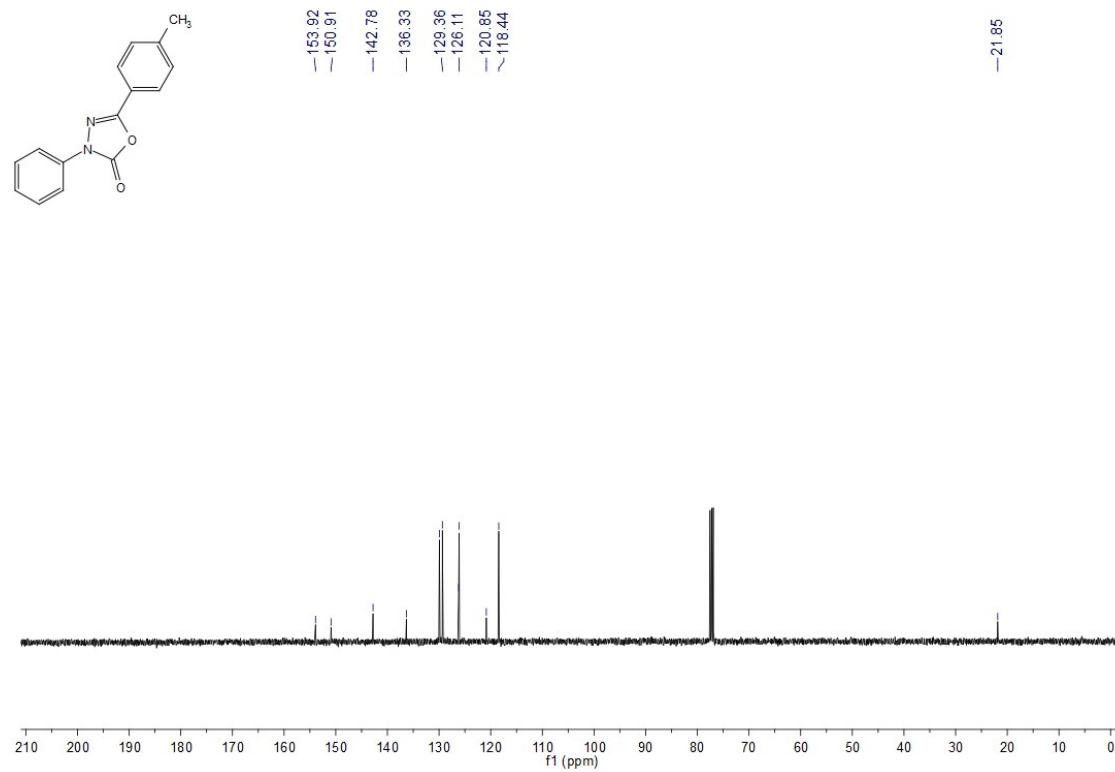

4e

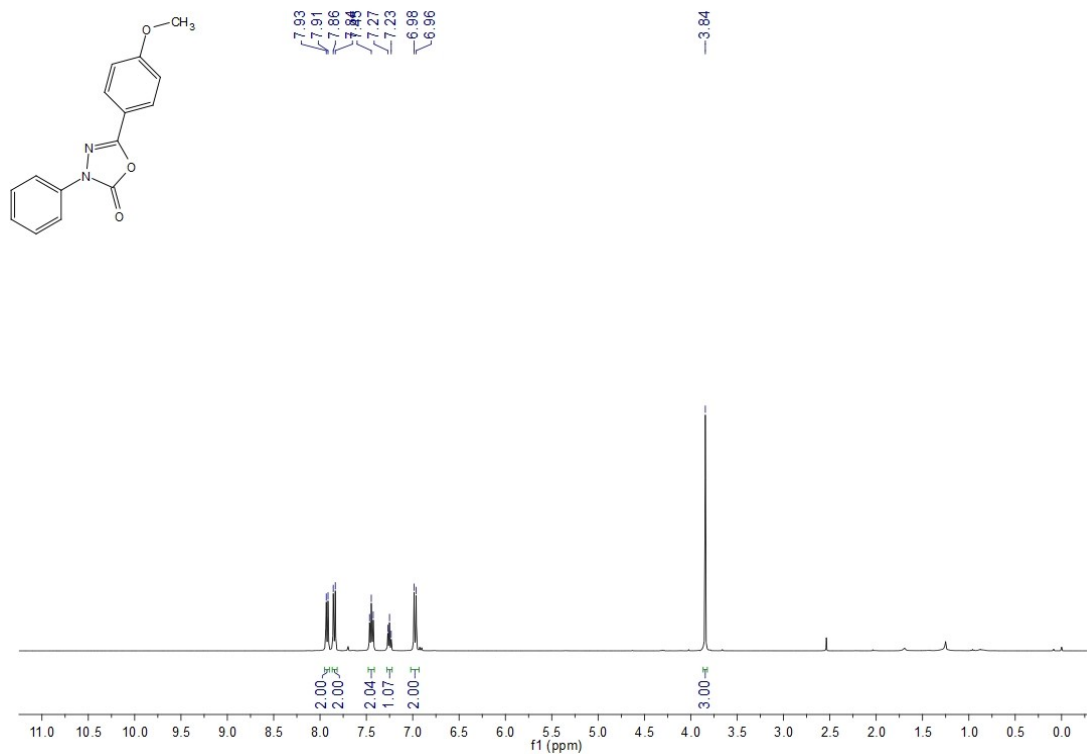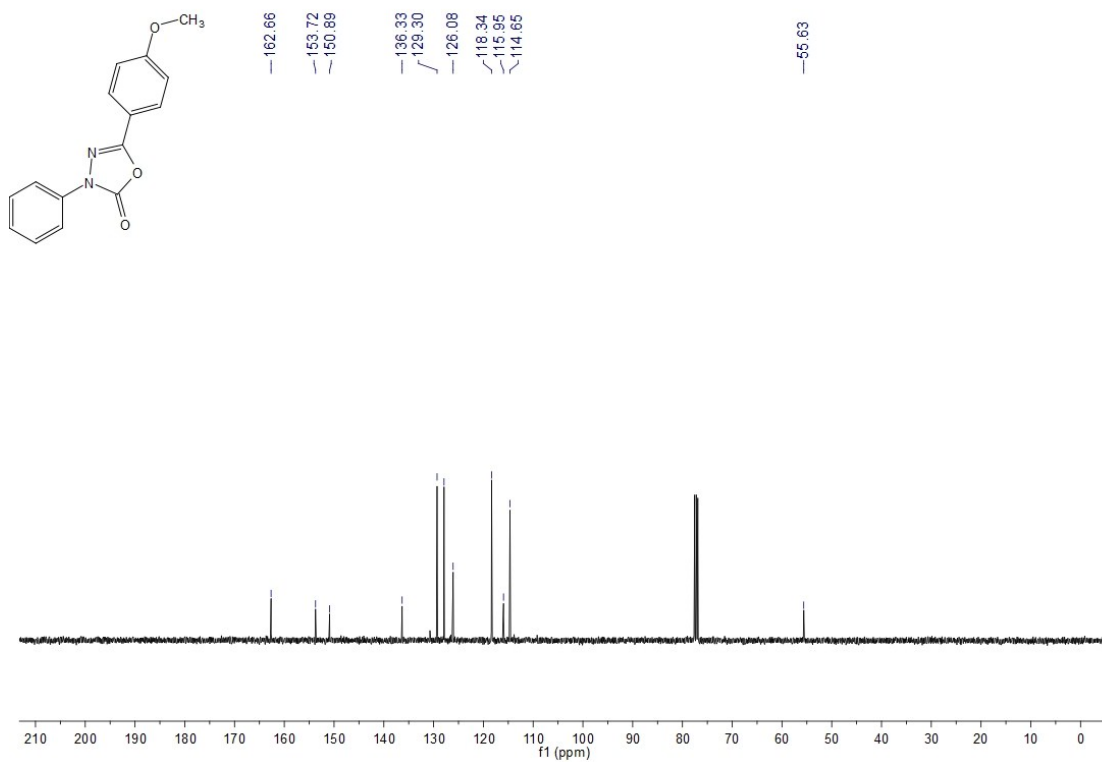

4f

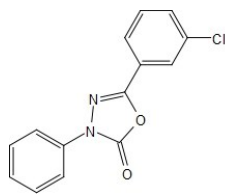

7.94  
7.92  
7.83  
7.81  
7.52  
7.50  
7.47  
7.45  
7.43  
7.31  
7.29  
7.27

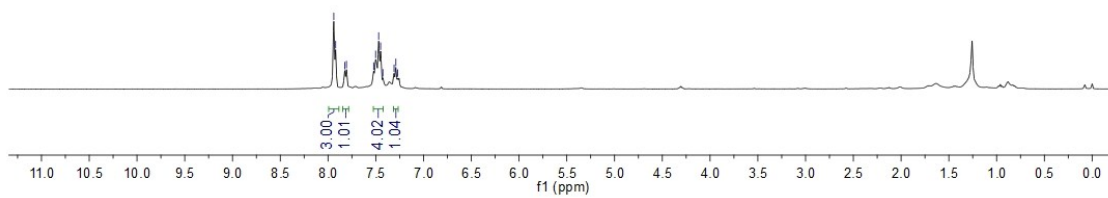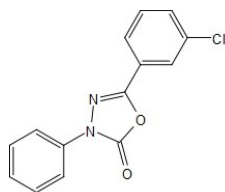

152.58  
150.58  
130.63  
129.46  
126.56  
126.16  
125.34  
124.24  
118.54

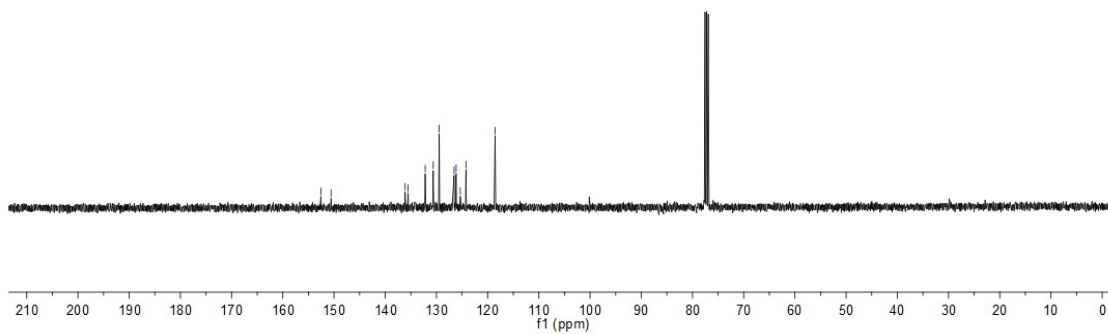

4g

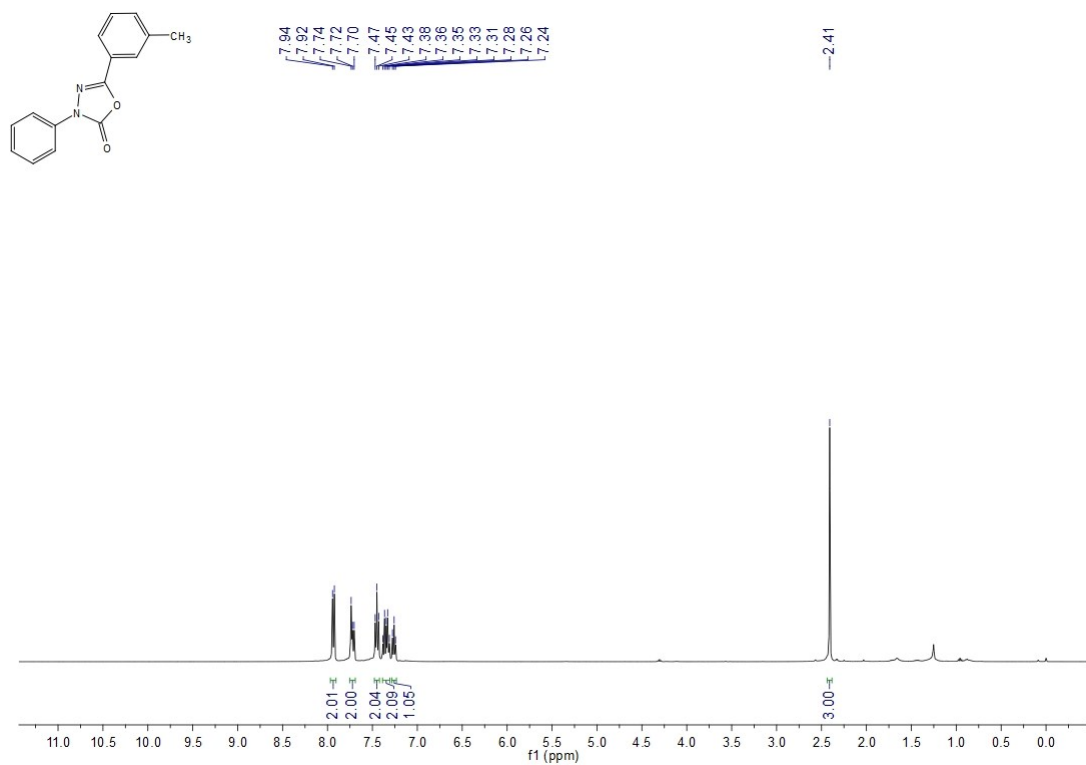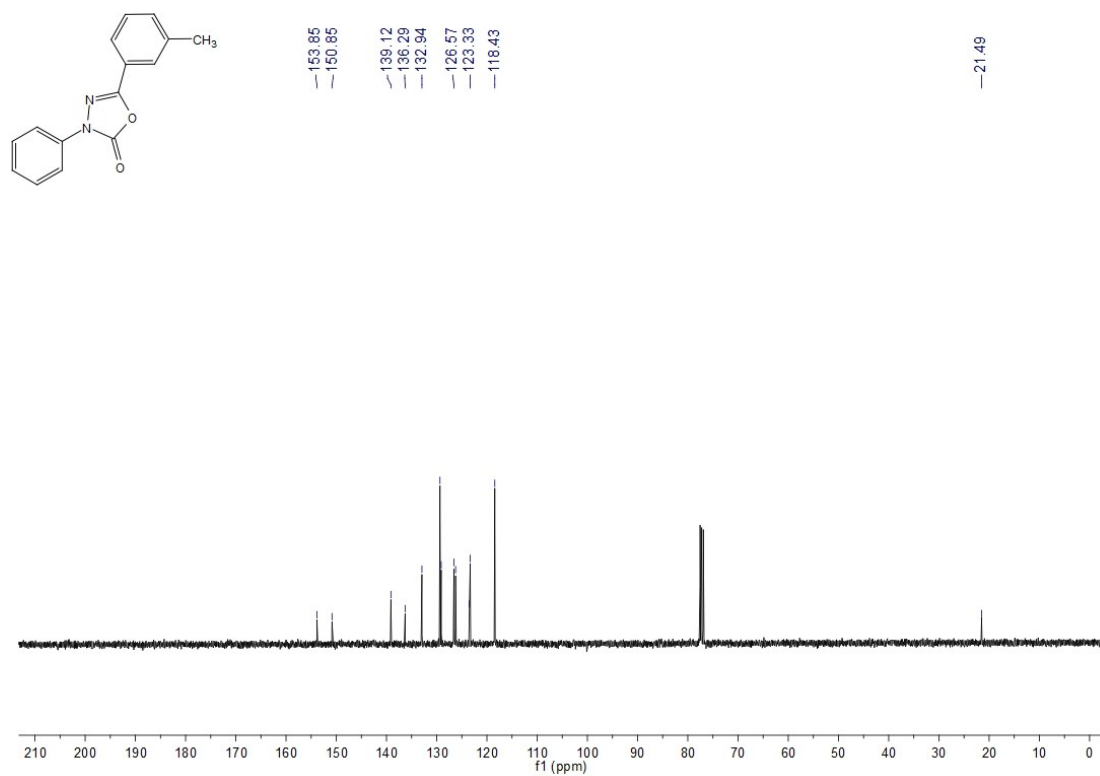

4h

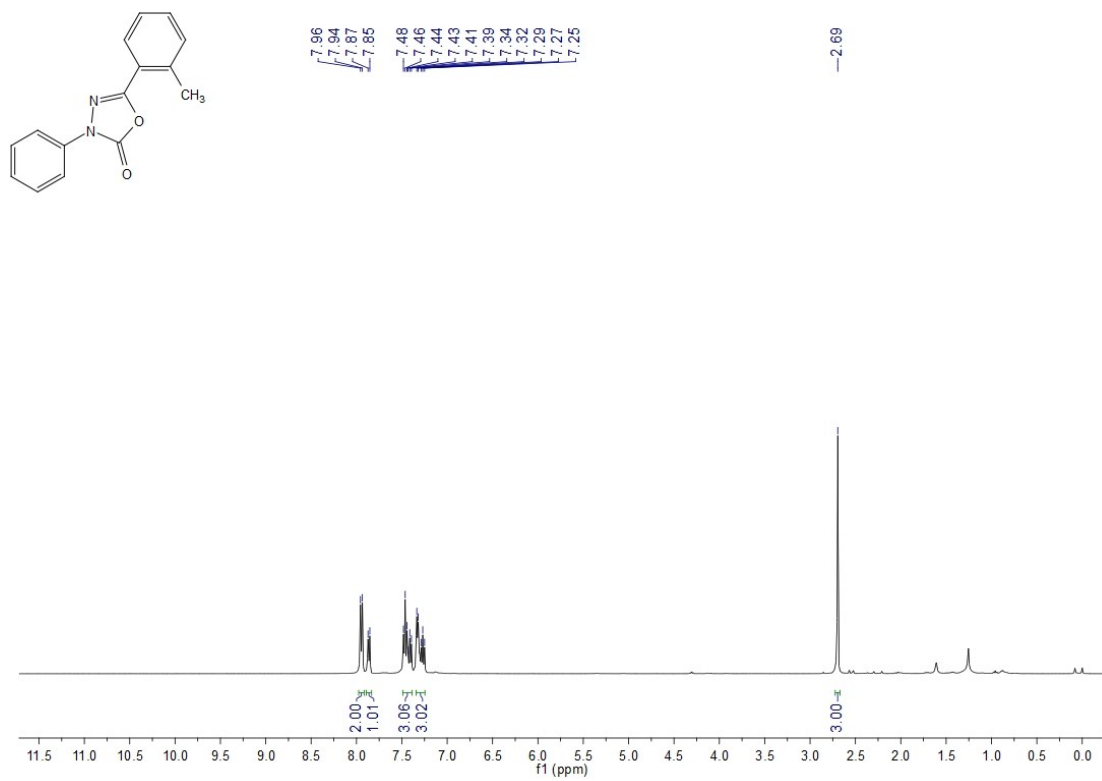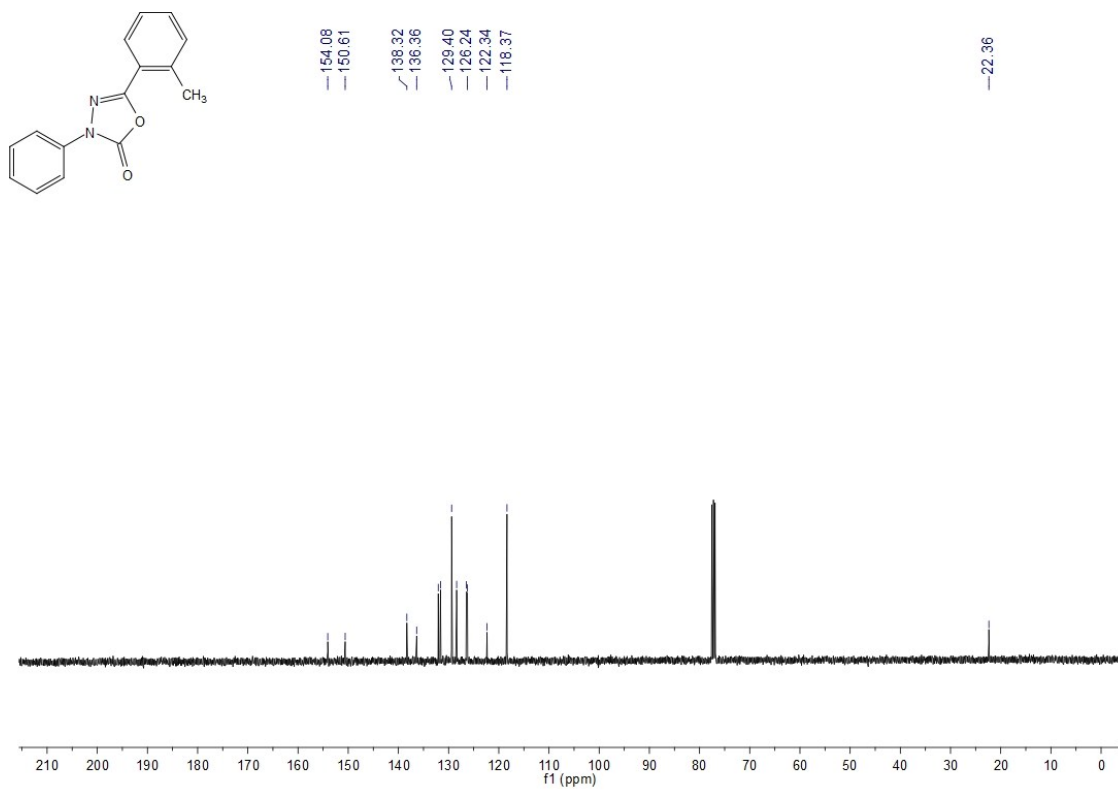

4i

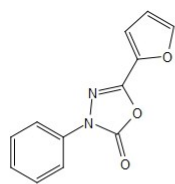

7.93  
7.91  
7.46  
7.28  
7.08  
6.61  
6.60

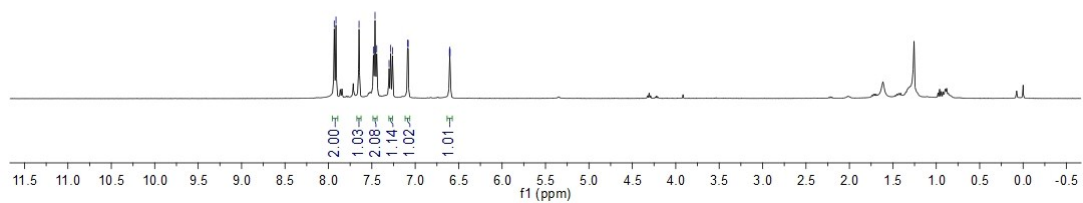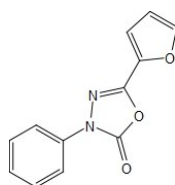

150.01  
147.13  
146.23  
138.83  
136.05  
129.40  
128.48  
118.63  
114.68  
112.31

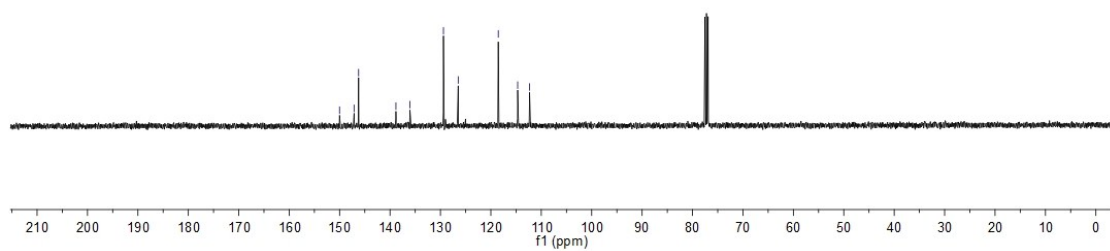

4j

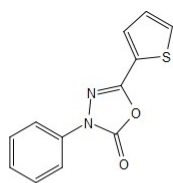

7.92  
7.90  
7.68  
7.55  
7.54  
7.47  
7.45  
7.43  
7.29  
7.27  
7.25  
7.15

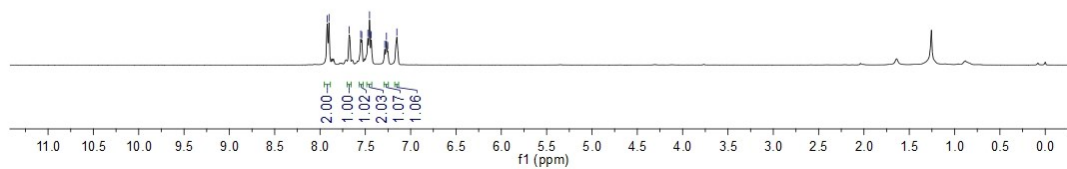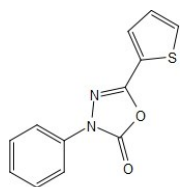

150.55  
150.33  
136.11  
129.39  
126.36  
118.50

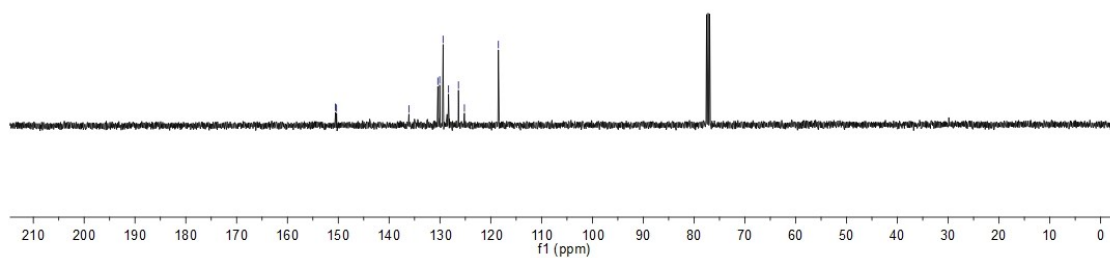

5a



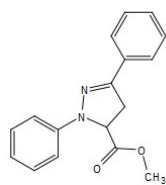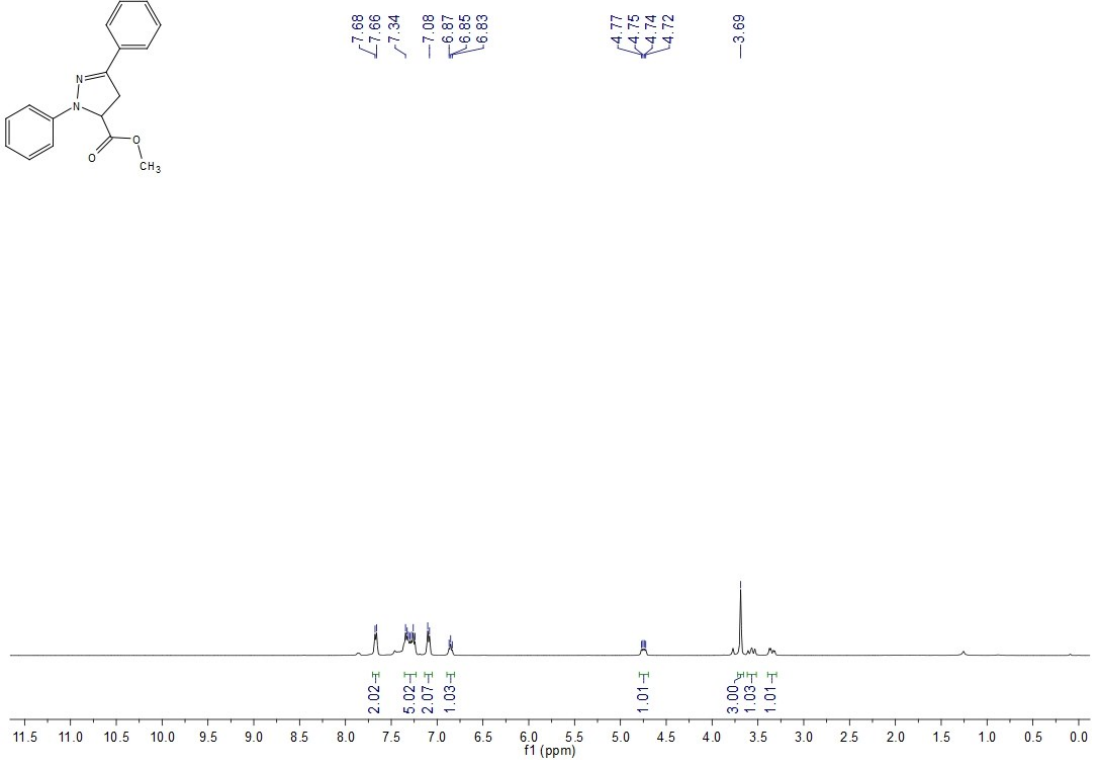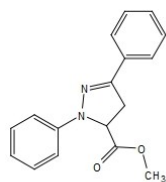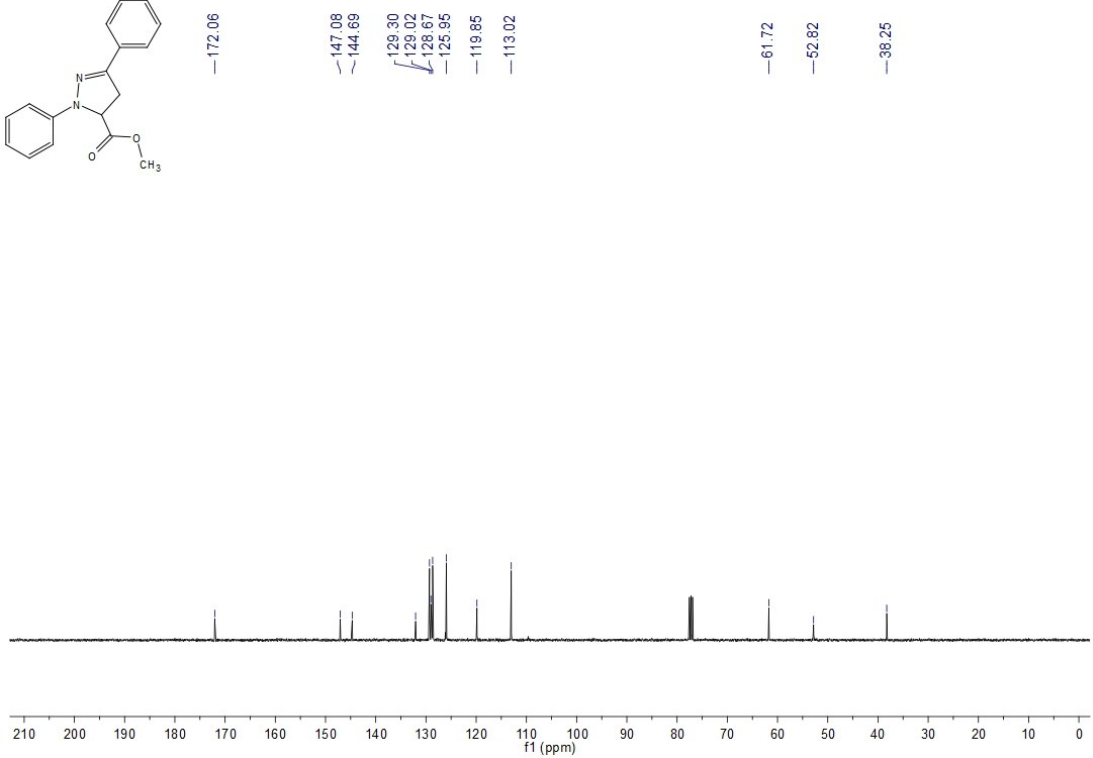

Supplement: c8qo01345d1.pdf [file c8qo01345d1.pdf]
